# Supplementary material
Source: publisher site journal article supplement (https://www.dovepress.com/article/206084)
Supplement: Supplementary file 1 [file get_supplementary_file.php]

Table S1. Characterization of included studies.

| First author | Ref. | Pt   | country         | Enterococci No. | species           | Samples               | Method of antimicrobial susceptibility testing | Guidelines used to interpret antimicrobial sensitivities | Q1 | Q2 | Q3 | Q4 | Q5 | Q6 | Q7 | Q8 | Q9 | Total score |
|--------------|------|------|-----------------|-----------------|-------------------|-----------------------|------------------------------------------------|----------------------------------------------------------|----|----|----|----|----|----|----|----|----|-------------|
| HSUEH        | (1)  | 2001 | Taiwan          | 125             | Enterococcus spp. | Blood & other samples | DDM                                            | NCCLS                                                    | 1  | 1  | 1  | 1  | 1  | 1  | 1  | 0  | 0  | 7           |
| Wroblewska   | (2)  | 2002 | Poland          | 3               | E. faecalis       | Blood                 | DDM                                            | NCCLS                                                    | 1  | 1  | 0  | 1  | 1  | 0  | 1  | 0  | 1  | 6           |
| Rodriguez    | (3)  | 2002 | USA             | 162             | E. faecalis       | Blood & other samples | DDM                                            | NCCLS                                                    | 1  | 1  | 1  | 1  | 1  | 1  | 1  | 0  | 0  | 7           |
| Hernandez    | (4)  | 2002 | Spain           | 377             | E. faecalis       | Blood & other samples | MIC                                            | CLSI                                                     | 1  | 1  | 1  | 1  | 1  | 1  | 1  | 0  | 0  | 7           |
| Wroblewska   | (2)  | 2002 | Poland          | 5               | E. faecium        | Blood                 | DDM                                            | NCCLS                                                    | 1  | 1  | 0  | 1  | 1  | 0  | 1  | 0  | 1  | 6           |
| Rodriguez    | (3)  | 2002 | USA             | 16              | E. faecium        | ND*****               | DDM                                            | NCCLS                                                    | 1  | 1  | 1  | 1  | 1  | 1  | 1  | 0  | 0  | 7           |
| Hernandez    | (4)  | 2002 | Spain           | 52              | E. faecium        | Blood & other samples | MIC                                            | CLSI                                                     | 1  | 1  | 1  | 1  | 1  | 1  | 1  | 0  | 0  | 7           |
| Woodford     | (5)  | 2003 | UK and Ireland  | 152             | E. faecalis       | Blood                 | UN                                             | UN                                                       | 1  | 1  | 1  | 0  | 1  | 1  | 1  | 0  | 1  | 7           |
| Arias        | (6)  | 2003 | Colombia        | 101             | E. faecalis       | Blood & other samples | MIC                                            | NCCLS                                                    | 1  | 1  | 1  | 1  | 1  | 1  | 1  | 0  | 1  | 8           |
| Johnson      | (7)  | 2003 | UK              | 166             | E. faecalis       | Blood & other samples | MIC                                            | BSAC                                                     | 1  | 1  | 1  | 1  | 1  | 1  | 1  | 0  | 0  | 7           |
| Mathur       | (8)  | 2003 | India           | 444             | E. faecalis       | Blood & other samples | MIC                                            | NCCLS                                                    | 0  | 0  | 1  | 0  | 0  | 0  | 0  | 0  | 0  | 1           |
| feizabadi    | (9)  | 2003 | Iran            | 59              | E. faecalis       | Blood & other samples | DDM                                            | CLSI                                                     | 1  | 0  | 1  | 0  | 1  | 1  | 1  | 0  | 0  | 5           |
| Arias        | (6)  | 2003 | Colombia        | 18              | E. faecium        | Blood & other samples | MIC                                            | NCCLS                                                    | 1  | 1  | 1  | 1  | 1  | 1  | 1  | 0  | 1  | 8           |
| Johnson      | (7)  | 2003 | UK              | 56              | E. faecium        | Blood & other samples | MIC                                            | BSAC                                                     | 1  | 1  | 1  | 1  | 1  | 1  | 1  | 0  | 0  | 7           |
| feizabadi    | (9)  | 2004 | Iran            | 273             | E. faecalis       | Blood & other samples | DDM                                            | UN                                                       | 1  | 0  | 1  | 0  | 1  | 1  | 1  | 0  | 0  | 5           |
| Karmarkar    | (10) | 2004 | India           | 10              | E. faecalis       | Blood & other samples | DDM                                            | NCCLS                                                    | 1  | 0  | 0  | 0  | 0  | 0  | 0  | 0  | 0  | 1           |
| feizabadi    | (9)  | 2004 | Iran            | 66              | E. faecium        | Blood & other samples | DDM                                            | UN                                                       | 1  | 0  | 1  | 0  | 1  | 1  | 1  | 0  | 0  | 5           |
| Karmarkar    | (10) | 2004 | India           | 42              | E. faecium        | Blood & other samples | DDM                                            | NCCLS                                                    | 1  | 0  | 0  | 0  | 0  | 0  | 0  | 0  | 0  | 1           |
| BLAHOVÁ      | (11) | 2004 | Slovak Republic | 32              | Enterococcus spp. | Blood                 | DDM                                            | NCCLS                                                    | 0  | 0  | 0  | 0  | 1  | 0  | 1  | 0  | 0  | 2           |
| Streit       | (12) | 2004 | North America   | 95              | Enterococcus spp. | Blood & other samples | MIC                                            | NCCLS                                                    | 1  | 1  | 1  | 1  | 1  | 1  | 1  | 0  | 1  | 8           |
| feizabadi    | (9)  | 2004 | Tehran          | 342             | Enterococcus spp. | Blood & other samples | DDM                                            | UN                                                       | 1  | 0  | 1  | 0  | 0  | 1  | 1  | 0  | 0  | 4           |
| Kapoor       | (13) | 2005 | India           | 10              | E. faecalis       | Blood                 | DDM                                            |                                                          | 1  | 1  | 1  | 1  | 1  | 1  | 1  | 0  | 0  | 7           |
| Stampone     | (14) | 2005 | Italy           | 918             | E. faecalis       | Blood                 | MIC                                            | NCCLS                                                    | 1  | 1  | 1  | 1  | 1  | 1  | 1  | 0  | 1  | 8           |

|          |      |      |             |      |                   |                       |     |       |   |   |   |   |   |   |   |   |   |   |
|----------|------|------|-------------|------|-------------------|-----------------------|-----|-------|---|---|---|---|---|---|---|---|---|---|
| Quinones | (15) | 2005 | Cuba        | 84   | E. faecalis       | Blood & other samples | DDM | UN    | 1 | 1 | 1 | 1 | 1 | 1 | 1 | 0 | 0 | 7 |
| Kacmaz   | (16) | 2005 | Turkey      | 207  | E. faecalis       | Blood & other samples | DDM | UN    | 1 | 1 | 1 | 1 | 1 | 1 | 1 | 0 | 1 | 8 |
| Kapoor   | (13) | 2005 | India       | 33   | E. faecium        | Blood                 | DDM | UN    | 1 | 1 | 1 | 1 | 1 | 1 | 1 | 0 | 0 | 7 |
| Stampone | (14) | 2005 | Italy       | 345  | E. faecium        | Blood                 | MIC | NCCLS | 1 | 1 | 1 | 1 | 1 | 1 | 1 | 0 | 1 | 8 |
| Quinones | (15) | 2005 | Cuba        | 10   | E. faecium        | Blood & other samples | DDM | UN    | 1 | 1 | 1 | 1 | 1 | 1 | 1 | 0 | 0 | 7 |
| Kacmaz   | (16) | 2005 | Turkey      | 25   | E. faecium        | Blood & other samples | DDM | UN    | 1 | 1 | 1 | 1 | 1 | 1 | 1 | 0 | 1 | 8 |
| Sader    | (17) | 2005 | (a)         | 1245 | Enterococcus spp. | Blood & other samples | MIC | CLSI  | 1 | 1 | 1 | 1 | 1 | 1 | 1 | 0 | 0 | 7 |
| SHAKED   | (18) | 2006 | Israel      | 93   | E. faecalis       | Blood & other samples | UN  | NCCLS | 1 | 1 | 1 | 1 | 1 | 1 | 1 | 1 | 0 | 8 |
| KLIBI    | (19) | 2006 | Tunis       | 139  | E. faecalis       | Blood & other samples | DDM | CASFM | 1 | 1 | 1 | 1 | 1 | 1 | 1 | 0 | 0 | 7 |
| Waites   | (20) | 2006 | USA         | 740  | E. faecalis       | Blood & other samples | MIC | CLSI  | 1 | 1 | 1 | 1 | 1 | 1 | 1 | 0 | 0 | 7 |
| Ghoshal  | (21) | 2006 | India       | 456  | E. faecalis       | Blood & other samples | DDM | UN    | 1 | 1 | 1 | 1 | 1 | 1 | 1 | 0 | 0 | 7 |
| SHAKED   | (18) | 2006 | Israel      | 22   | E. faecium        | Blood                 | UN  | NCCLS | 1 | 1 | 1 | 1 | 1 | 1 | 1 | 1 | 0 | 8 |
| KLIBI    | (19) | 2006 | Tunis       | 41   | E. faecium        | Blood & other samples | DDM | CASFM | 1 | 1 | 1 | 1 | 1 | 1 | 1 | 0 | 0 | 7 |
| Waites   | (20) | 2006 | USA         | 280  | E. faecium        | ND                    | MIC | CLSI  | 1 | 1 | 1 | 1 | 1 | 1 | 1 | 0 | 0 | 7 |
| Ghoshal  | (21) | 2006 | India       | 229  | E. faecium        | Blood & other samples | DDM | UN    | 1 | 1 | 1 | 1 | 1 | 1 | 1 | 0 | 0 | 7 |
| Sader    | (17) | 2006 | Belgium     | 48   | Enterococcus spp. | Blood & other samples | MIC | CLSI  | 1 | 1 | 0 | 1 | 1 | 1 | 1 | 0 | 0 | 6 |
| Sader    | (17) | 2006 | France      | 247  | Enterococcus spp. | Blood & other samples | MIC | CLSI  | 1 | 1 | 0 | 1 | 1 | 1 | 1 | 0 | 0 | 6 |
| Sader    | (17) | 2006 | Germany     | 353  | Enterococcus spp. | Blood & other samples | MIC | CLSI  | 1 | 1 | 0 | 1 | 1 | 1 | 1 | 0 | 0 | 6 |
| Sader    | (17) | 2006 | Greece      | 62   | Enterococcus spp. | Blood & other samples | MIC | CLSI  | 1 | 1 | 0 | 1 | 1 | 1 | 1 | 0 | 0 | 6 |
| Sader    | (17) | 2006 | Ireland     | 80   | Enterococcus spp. | Blood & other samples | MIC | CLSI  | 1 | 1 | 0 | 1 | 1 | 1 | 1 | 0 | 0 | 6 |
| Sader    | (17) | 2006 | Israel      | 39   | Enterococcus spp. | Blood & other samples | MIC | CLSI  | 1 | 1 | 0 | 1 | 1 | 1 | 1 | 0 | 0 | 6 |
| Sader    | (17) | 2006 | Italy       | 166  | Enterococcus spp. | Blood & other samples | MIC | CLSI  | 1 | 1 | 0 | 1 | 1 | 1 | 1 | 0 | 0 | 6 |
| Sader    | (17) | 2006 | Poland      | 32   | Enterococcus spp. | Blood & other samples | MIC | CLSI  | 1 | 1 | 0 | 1 | 1 | 1 | 1 | 0 | 0 | 6 |
| Sader    | (17) | 2006 | Russia      | 23   | Enterococcus spp. | Blood & other samples | MIC | CLSI  | 1 | 1 | 0 | 1 | 1 | 1 | 1 | 0 | 0 | 6 |
| Sader    | (17) | 2006 | Spain       | 114  | Enterococcus spp. | Blood & other samples | MIC | CLSI  | 1 | 1 | 0 | 1 | 1 | 1 | 1 | 0 | 0 | 6 |
| Sader    | (17) | 2006 | Sweden      | 131  | Enterococcus spp. | Blood & other samples | MIC | CLSI  | 1 | 1 | 0 | 1 | 1 | 1 | 1 | 0 | 0 | 6 |
| Sader    | (17) | 2006 | Switzerland | 58   | Enterococcus spp. | Blood & other samples | MIC | CLSI  | 1 | 1 | 0 | 1 | 1 | 1 | 1 | 0 | 0 | 6 |



|            |      |      |             |     |                   |                       |     |       |   |   |   |   |   |   |   |   |   |   |
|------------|------|------|-------------|-----|-------------------|-----------------------|-----|-------|---|---|---|---|---|---|---|---|---|---|
| Sader      | (17) | 2007 | Poland      | 23  | E. faecium        | Blood & other samples | MIC | CLSI  | 1 | 1 | 1 | 1 | 1 | 1 | 1 | 0 | 1 | 8 |
| Sader      | (17) | 2007 | Spain       | 14  | E. faecium        | Blood & other samples | MIC | CLSI  | 1 | 1 | 1 | 1 | 1 | 1 | 1 | 0 | 1 | 8 |
| Sader      | (17) | 2007 | Sweden      | 21  | E. faecium        | Blood & other samples | MIC | CLSI  | 1 | 1 | 1 | 1 | 1 | 1 | 1 | 0 | 1 | 8 |
| Sader      | (17) | 2007 | Switzerland | 4   | E. faecium        | Blood & other samples | MIC | CLSI  | 1 | 1 | 1 | 1 | 1 | 1 | 1 | 0 | 1 | 8 |
| Sader      | (17) | 2007 | Turkey      | 70  | E. faecium        | Blood & other samples | MIC | CLSI  | 1 | 1 | 1 | 1 | 1 | 1 | 1 | 0 | 1 | 8 |
| Młynarczyk | (22) | 2007 | Poland      | 64  | E. faecium        | Blood & other samples | DDM | UN    | 1 | 1 | 1 | 1 | 1 | 1 | 1 | 0 | 0 | 7 |
| Młynarczyk | (22) | 2007 | Poland      | 73  | E. faecium        | Blood & other samples | DDM | UN    | 1 | 1 | 1 | 1 | 1 | 1 | 1 | 0 | 0 | 7 |
| Młynarczyk | (22) | 2007 | Poland      | 77  | E. faecium        | Blood & other samples | DDM | UN    | 1 | 1 | 1 | 1 | 1 | 1 | 1 | 0 | 0 | 7 |
| Młynarczyk | (22) | 2007 | Poland      | 84  | E. faecium        | Blood & other samples | DDM | UN    | 1 | 1 | 1 | 1 | 1 | 1 | 1 | 0 | 0 | 7 |
| Młynarczyk | (22) | 2007 | Poland      | 162 | E. faecium        | Blood & other samples | DDM | UN    | 1 | 1 | 1 | 1 | 1 | 1 | 1 | 0 | 0 | 7 |
| Sader      | (17) | 2007 | UK          | 18  | Enterococcus spp. | Blood & other samples | MIC | CLSI  | 1 | 1 | 1 | 1 | 1 | 1 | 1 | 0 | 1 | 8 |
| Mendiratta | (23) | 2008 | India       | 128 | E. faecalis       | Blood & other samples | MIC | NCCLS | 1 | 0 | 1 | 0 | 1 | 1 | 1 | 0 | 0 | 5 |
| Emaneyni   | (24) | 2008 | Iran        | 210 | E. faecalis       | Blood & other samples | DDM | NCCLS | 1 | 1 | 1 | 1 | 1 | 1 | 1 | 0 | 0 | 7 |
| Agarwal    | (25) | 2008 | India       | 42  | E. faecalis       | Blood & other samples | DDM | NCCLS | 1 | 1 | 1 | 1 | 1 | 0 | 1 | 0 | 0 | 6 |
| Billström  | (26) | 2008 | Sweden      | 263 | E. faecium        | Blood                 | MIC |       | 1 | 0 | 1 | 1 | 1 | 1 | 1 | 1 | 0 | 7 |
| Mendiratta | (23) | 2008 | India       | 22  | E. faecium        | Blood & other samples | DDM | NCCLS | 1 | 0 | 1 | 0 | 1 | 1 | 1 | 0 | 0 | 5 |
| Emaneyni   | (24) | 2008 | Iran        | 116 | E. faecium        | Blood & other samples | DDM | NCCLS | 1 | 1 | 1 | 1 | 1 | 1 | 1 | 0 | 0 | 7 |
| Agarwal    | (25) | 2008 | India       | 33  | E. faecium        | Blood & other samples | DDM | NCCLS | 1 | 1 | 1 | 1 | 1 | 0 | 1 | 0 | 0 | 6 |
| Zhanel     | (27) | 2008 | Canada      | 74  | Enterococcus spp. | Blood                 | DDM | CLSI  | 1 | 1 | 1 | 1 | 1 | 1 | 1 | 1 | 1 | 9 |
| Jarousha   | (28) | 2008 | Palestine   | 6   | Enterococcus spp. | Blood & other samples | DDM | UN    | 1 | 0 | 0 | 0 | 0 | 0 | 0 | 0 | 0 | 1 |
| CLAEISSON  | (29) | 2009 | Sweden      | 429 | E. faecalis       | Blood & other samples | DDM | UN    | 1 | 1 | 1 | 1 | 1 | 1 | 1 | 1 | 0 | 8 |
| Montravers | (30) | 2009 | France      | 59  | E. faecalis       | Blood & other samples | UN  | CASFM | 1 | 1 | 1 | 1 | 1 | 1 | 1 | 1 | 1 | 9 |
| Sader      | (17) | 2009 | Argentina   | 244 | E. faecalis       | Blood & other samples | MIC | CLSI  | 1 | 1 | 0 | 1 | 1 | 1 | 1 | 0 | 0 | 6 |
| Sader      | (17) | 2009 | Brazil      | 836 | E. faecalis       | Blood & other samples | MIC | CLSI  | 1 | 1 | 0 | 1 | 1 | 1 | 1 | 0 | 0 | 6 |
| Sader      | (17) | 2009 | Chile       | 276 | E. faecalis       | Blood & other samples | MIC | CLSI  | 1 | 1 | 0 | 1 | 1 | 1 | 1 | 0 | 0 | 6 |
| Sader      | (17) | 2009 | Mexico      | 325 | E. faecalis       | Blood & other samples | MIC | CLSI  | 1 | 1 | 0 | 1 | 1 | 1 | 1 | 0 | 0 | 6 |

|               |      |      |           |     |                   |                       |     |       |   |   |   |   |   |   |   |   |   |   |   |
|---------------|------|------|-----------|-----|-------------------|-----------------------|-----|-------|---|---|---|---|---|---|---|---|---|---|---|
| Gales         | (31) | 2009 | Brazil    | 625 | E. faecalis       | Blood & other samples | MIC | CLSI  | 1 | 1 | 0 | 1 | 1 | 1 | 1 | 0 | 0 | 6 |   |
| YASLIANI      | (32) | 2009 | Iran      | 160 | E. faecalis       | Blood & other samples | DDM | UN    | 1 | 1 | 1 | 0 | 0 | 1 | 1 | 0 | 0 | 5 |   |
| CLAESSION     | (29) | 2009 | Sweden    | 241 | E. faecium        | Blood & other samples | DDM | UN    | 1 | 1 | 1 | 1 | 1 | 1 | 1 | 1 | 0 | 8 |   |
| Montravers    | (30) | 2009 | France    | 24  | E. faecium        | Blood & other samples | UN  | CASFM | 1 | 1 | 1 | 1 | 1 | 1 | 1 | 1 | 1 | 9 |   |
| Sader         | (17) | 2009 | Argentina | 52  | E. faecium        | Blood & other samples | MIC | CLSI  | 1 | 1 | 1 | 1 | 1 | 1 | 1 | 1 | 0 | 7 |   |
| Sader         | (17) | 2009 | Brazil    | 146 | E. faecium        | Blood & other samples | MIC | CLSI  | 1 | 1 | 1 | 1 | 1 | 1 | 1 | 1 | 0 | 7 |   |
| Sader         | (17) | 2009 | Chile     | 54  | E. faecium        | Blood & other samples | MIC | CLSI  | 1 | 1 | 1 | 1 | 1 | 1 | 1 | 1 | 0 | 7 |   |
| Sader         | (17) | 2009 | Mexico    | 130 | E. faecium        | Blood & other samples | MIC | CLSI  | 1 | 1 | 1 | 1 | 1 | 1 | 1 | 1 | 0 | 7 |   |
| Gales         | (31) | 2009 | Brazil    | 102 | E. faecium        | Blood & other samples | MIC | CLSI  | 1 | 1 | 0 | 1 | 1 | 1 | 1 | 1 | 0 | 6 |   |
| YASLIANI      | (32) | 2009 | Iran      | 22  | E. faecium        | Blood & other samples | DDM | UN    | 1 | 1 | 1 | 0 | 0 | 1 | 1 | 0 | 0 | 5 |   |
| Adhikari      | (33) | 2010 | India     | 130 | E. faecalis       | Blood & other samples | DDM | UN    | 1 | 1 | 1 | 1 | 1 | 1 | 1 | 0 | 0 | 7 |   |
| Protonotariou | (34) | 2010 | Greece    | 145 | E. faecalis       | Blood & other samples | MIC | CLSI  | 1 | 1 | 1 | 1 | 1 | 1 | 1 | 1 | 1 | 0 | 8 |
| Protonotariou | (34) | 2010 | Greece    | 232 | E. faecalis       | Blood & other samples | MIC | CLSI  | 1 | 1 | 1 | 1 | 1 | 1 | 1 | 1 | 1 | 0 | 8 |
| Protonotariou | (34) | 2010 | Greece    | 256 | E. faecalis       | Blood & other samples | MIC | CLSI  | 1 | 1 | 1 | 1 | 1 | 1 | 1 | 1 | 1 | 0 | 8 |
| Protonotariou | (34) | 2010 | Greece    | 230 | E. faecalis       | Blood & other samples | MIC | CLSI  | 1 | 1 | 1 | 1 | 1 | 1 | 1 | 1 | 1 | 0 | 8 |
| Protonotariou | (34) | 2010 | Greece    | 293 | E. faecalis       | Blood & other samples | MIC | CLSI  | 1 | 1 | 1 | 1 | 1 | 1 | 1 | 1 | 1 | 0 | 8 |
| Protonotariou | (34) | 2010 | Greece    | 342 | E. faecalis       | Blood & other samples | MIC | CLSI  | 1 | 1 | 1 | 1 | 1 | 1 | 1 | 1 | 1 | 0 | 8 |
| Adhikari      | (33) | 2010 | India     | 17  | E. faecium        | Blood & other samples | DDM | UN    | 1 | 1 | 1 | 1 | 1 | 1 | 1 | 0 | 0 | 7 |   |
| Protonotariou | (34) | 2010 | Greece    | 47  | E. faecium        | Blood & other samples | MIC | CLSI  | 1 | 1 | 1 | 1 | 1 | 1 | 1 | 1 | 1 | 0 | 8 |
| Protonotariou | (34) | 2010 | Greece    | 85  | E. faecium        | Blood & other samples | MIC | CLSI  | 1 | 1 | 1 | 1 | 1 | 1 | 1 | 1 | 1 | 0 | 8 |
| Protonotariou | (34) | 2010 | Greece    | 111 | E. faecium        | Blood & other samples | MIC | CLSI  | 1 | 1 | 1 | 1 | 1 | 1 | 1 | 1 | 1 | 0 | 8 |
| Protonotariou | (34) | 2010 | Greece    | 89  | E. faecium        | Blood & other samples | MIC | CLSI  | 1 | 1 | 1 | 1 | 1 | 1 | 1 | 1 | 1 | 0 | 8 |
| Protonotariou | (34) | 2010 | Greece    | 142 | E. faecium        | Blood & other samples | MIC | CLSI  | 1 | 1 | 1 | 1 | 1 | 1 | 1 | 1 | 1 | 0 | 8 |
| Protonotariou | (34) | 2010 | Greece    | 151 | E. faecium        | Blood & other samples | MIC | CLSI  | 1 | 1 | 1 | 1 | 1 | 1 | 1 | 1 | 1 | 0 | 8 |
| KOHLI         | (35) | 2010 | NAIROBI   | 43  | Enterococcus spp. | Blood                 | DDM | CLSI  | 1 | 1 | 0 | 1 | 0 | 0 | 1 | 0 | 0 | 4 |   |
| Adhikari      | (33) | 2010 | India     | 180 | Enterococcus spp. | Blood & other samples | UN  | UN    | 1 | 0 | 1 | 1 | 0 | 1 | 1 | 0 | 0 | 5 |   |









|           |      |      |              |     |                   |                       |     |        |   |   |   |   |   |   |   |   |   |   |
|-----------|------|------|--------------|-----|-------------------|-----------------------|-----|--------|---|---|---|---|---|---|---|---|---|---|
| TayWang   | (55) | 2013 | Taiwan       | 335 | E. faecalis       | Blood & other samples | MIC | CLSI   | 1 | 1 | 1 | 1 | 1 | 1 | 1 | 1 | 0 | 8 |
| TayWang   | (55) | 2013 | Taiwan       | 317 | E. faecalis       | Blood & other samples | MIC | CLSI   | 1 | 1 | 1 | 1 | 1 | 1 | 1 | 1 | 0 | 8 |
| TayWang   | (55) | 2013 | Taiwan       | 359 | E. faecalis       | Blood & other samples | MIC | CLSI   | 1 | 1 | 1 | 1 | 1 | 1 | 1 | 1 | 0 | 8 |
| Fernandes | (56) | 2013 | India        | 84  | E. faecalis       | Blood & other samples | DDM | UN     | 1 | 1 | 1 | 1 | 1 | 1 | 1 | 0 | 0 | 7 |
| Coombs    | (54) | 2013 | Australia    | 375 | E. faecium        | Blood                 | MIC | CLSI   | 1 | 1 | 1 | 1 | 1 | 1 | 1 | 1 | 1 | 9 |
| TayWang   | (55) | 2013 | Taiwan       | 49  | E. faecium        | Blood & other samples | MIC | CLSI   | 1 | 1 | 1 | 1 | 1 | 1 | 1 | 1 | 0 | 8 |
| TayWang   | (55) | 2013 | Taiwan       | 66  | E. faecium        | Blood & other samples | MIC | CLSI   | 1 | 1 | 1 | 1 | 1 | 1 | 1 | 1 | 0 | 8 |
| TayWang   | (55) | 2013 | Taiwan       | 75  | E. faecium        | Blood & other samples | MIC | CLSI   | 1 | 1 | 1 | 1 | 1 | 1 | 1 | 1 | 0 | 8 |
| TayWang   | (55) | 2013 | Taiwan       | 115 | E. faecium        | Blood & other samples | MIC | CLSI   | 1 | 1 | 1 | 1 | 1 | 1 | 1 | 1 | 0 | 8 |
| TayWang   | (55) | 2013 | Taiwan       | 147 | E. faecium        | Blood & other samples | MIC | CLSI   | 1 | 1 | 1 | 1 | 1 | 1 | 1 | 1 | 0 | 8 |
| Fernandes | (56) | 2013 | India        | 51  | E. faecium        | Blood & other samples | DDM | UN     | 1 | 1 | 1 | 1 | 1 | 1 | 1 | 0 | 0 | 7 |
| Praharaj  | (57) | 2013 | India        | 367 | Enterococcus spp. | Blood & other samples | DDM | CLSI   | 1 | 1 | 1 | 1 | 1 | 1 | 1 | 0 | 0 | 7 |
| CELIK     | (58) | 2014 | Turkey       | 63  | E. faecalis       | Blood & other samples | DDM | UN     | 1 | 1 | 1 | 1 | 1 | 0 | 1 | 0 | 0 | 6 |
| Samadi    | (59) | 2014 | Iran         | 106 | E. faecalis       | Blood & other samples | DDM | CLSI   | 1 | 0 | 1 | 1 | 1 | 0 | 1 | 0 | 0 | 5 |
| Padmasini | (60) | 2014 | India        | 86  | E. faecalis       | Blood & other samples | MIC | CLSI   | 1 | 1 | 1 | 1 | 1 | 1 | 1 | 0 | 0 | 7 |
| CELIK     | (58) | 2014 | Turkey       | 59  | E. faecium        | Blood & other samples | DDM | UN     | 1 | 1 | 1 | 1 | 1 | 0 | 1 | 0 | 0 | 6 |
| Moemen    | (61) | 2014 | Egypt        | 52  | E. faecium        | Blood & other samples | DDM | CLSI   | 1 | 1 | 1 | 1 | 1 | 1 | 1 | 1 | 0 | 8 |
| Samadi    | (59) | 2014 | Iran         | 80  | E. faecium        | Blood & other samples | DDM | CLSI   | 1 | 0 | 1 | 1 | 1 | 0 | 1 | 0 | 0 | 5 |
| Padmasini | (60) | 2014 | India        | 80  | E. faecium        | Blood & other samples | MIC | CLSI   | 1 | 1 | 1 | 1 | 1 | 1 | 1 | 0 | 0 | 7 |
| singh     |      | 2014 | India        | 201 | Enterococcus spp. | Blood & other samples | DDM | CLSI   | 1 | 1 | 1 | 0 | 1 | 0 | 1 | 0 | 0 | 5 |
| Sirkhazi  | (62) | 2014 | Saudi Arabia | 8   | Enterococcus spp. | Blood & other samples | UN  | CLSI   | 0 | 0 | 0 | 0 | 1 | 0 | 1 | 0 | 0 | 2 |
| Babar     | (63) | 2014 | Pakistan     | 190 | Enterococcus spp. | Blood & other samples | DDM | UN     | 1 | 1 | 1 | 0 | 1 | 0 | 1 | 0 | 0 | 5 |
| Abat      | (64) | 2015 | France       | 156 | E. faecalis       | Blood                 | DDM | EUCAST | 1 | 1 | 1 | 1 | 1 | 1 | 1 | 1 | 0 | 8 |
| Kajihara  | (65) | 2015 | Japan        | 144 | E. faecalis       | Blood & other samples | MIC | CLSI   | 1 | 1 | 1 | 1 | 1 | 1 | 1 | 1 | 1 | 9 |
| Bhatt     | (66) | 2015 | India        | 150 | E. faecalis       | Blood & other samples | DDM | CLSI   | 1 | 1 | 1 | 0 | 1 | 1 | 1 | 0 | 0 | 6 |
| NASAJ     | (67) | 2015 | Iran         | 175 | E. faecalis       | Blood & other samples | DDM | CLSI   | 1 | 0 | 1 | 1 | 1 | 1 | 1 | 0 | 0 | 6 |



|            |      |      |        |     |                   |                       |     |      |   |   |   |   |   |   |   |   |   |   |
|------------|------|------|--------|-----|-------------------|-----------------------|-----|------|---|---|---|---|---|---|---|---|---|---|
| Pitiriga   | (82) | 2018 | Greece | 55  | E. faecalis       | Blood & other samples | UN  | UN   | 1 | 1 | 1 | 1 | 1 | 1 | 1 | 1 | 0 | 8 |
| Pitiriga   | (82) | 2018 | Greece | 108 | E. faecalis       | Blood & other samples | UN  | UN   | 1 | 1 | 1 | 1 | 1 | 1 | 1 | 1 | 0 | 8 |
| Pitiriga   | (82) | 2018 | Greece | 67  | E. faecalis       | Blood & other samples | UN  | UN   | 1 | 1 | 1 | 1 | 1 | 1 | 1 | 1 | 0 | 8 |
| Pitiriga   | (82) | 2018 | Greece | 57  | E. faecalis       | Blood & other samples | UN  | UN   | 1 | 1 | 1 | 1 | 1 | 1 | 1 | 1 | 0 | 8 |
| Pitiriga   | (82) | 2018 | Greece | 15  | E. faecium        | Blood & other samples | UN  | CLSI | 1 | 1 | 1 | 1 | 1 | 1 | 1 | 1 | 0 | 8 |
| Pitiriga   | (82) | 2018 | Greece | 28  | E. faecium        | Blood & other samples | UN  | CLSI | 1 | 1 | 1 | 1 | 1 | 1 | 1 | 1 | 0 | 8 |
| Pitiriga   | (82) | 2018 | Greece | 11  | E. faecium        | Blood & other samples | UN  | CLSI | 1 | 1 | 1 | 1 | 1 | 1 | 1 | 1 | 0 | 8 |
| Pitiriga   | (82) | 2018 | Greece | 5   | E. faecium        | Blood & other samples | UN  | CLSI | 1 | 1 | 1 | 1 | 1 | 1 | 1 | 1 | 0 | 8 |
| Pitiriga   | (82) | 2018 | Greece | 15  | E. faecium        | Blood & other samples | UN  | UN   | 1 | 1 | 1 | 1 | 1 | 1 | 1 | 1 | 0 | 8 |
| Pitiriga   | (82) | 2018 | Greece | 28  | E. faecium        | Blood & other samples | UN  | UN   | 1 | 1 | 1 | 1 | 1 | 1 | 1 | 1 | 0 | 8 |
| Pitiriga   | (82) | 2018 | Greece | 11  | E. faecium        | Blood & other samples | UN  | UN   | 1 | 1 | 1 | 1 | 1 | 1 | 1 | 1 | 0 | 8 |
| Pitiriga   | (82) | 2018 | Greece | 5   | E. faecium        | Blood & other samples | UN  | UN   | 1 | 1 | 1 | 1 | 1 | 1 | 1 | 1 | 0 | 8 |
| Karimzadeh | (83) | 2018 | Iran   | 89  | Enterococcus spp. | Blood & other samples | DDM | CLSI | 1 | 1 | 1 | 1 | 1 | 0 | 1 | 0 | 0 | 6 |

MIC: Minimum Inhibitory Concentration, DDM: Disc diffusion method, NCCLS: National Committee for Clinical Laboratory Standards, CLSI: The Clinical & Laboratory Standards Institute, BSAC: British Society for Antimicrobial Chemotherapy, EUCAST: European Committee on Antimicrobial Susceptibility Testing, ARSE: Antimicrobial resistance surveillance in Europe ; (a)North America, South America, Europe, and the Asia–Australia areas, UN: Non Known ; Q1: Was the sample frame appropriate to address the target population? ; Q2: Were study participants sampled in an appropriate way? ; Q3: Was the sample size adequate? ; Q4: Were the study subjects and the setting described in detail? ; Q5: Was the data analysis conducted with sufficient coverage of the identified sample? ; Q6: Were valid methods used for the identification of the condition? ; Q7: Was the condition measured in a standard, reliable way for all participants? ; Q8: Was there appropriate statistical analysis? ; Q9: Was the response rate adequate, and if not, was the low response rate managed appropriately?; 0: NO; 1: YES.

Table S2. Prevalence of Vancomycin resistance in blood isolated Enterococcus spp.

| Groups                        |                | Effect size and 95% interval |             |             | Test of null (2-Tail) |         | Heterogeneity |        |         |           |
|-------------------------------|----------------|------------------------------|-------------|-------------|-----------------------|---------|---------------|--------|---------|-----------|
| Group                         | Number Studies | Point estimate               | Lower limit | Upper limit | Z-value               | P-value | Q-value       | df (Q) | P-value | I-squared |
| <b>Mixed effects analysis</b> |                |                              |             |             |                       |         |               |        |         |           |
| E. faecalis                   | 88             | 0.019                        | 0.014       | 0.025       | -26.812               | 0.000   | 390.420       | 87     | 0.000   | 77.716    |
| E. faecium                    | 108            | 0.101                        | 0.079       | 0.128       | -15.820               | 0.000   | 1728.756      | 107    | 0.000   | 93.811    |
| Enterococcus                  | 49             | 0.119                        | 0.094       | 0.149       | -14.922               | 0.000   | 435.481       | 48     | 0.000   | 88.978    |
| Total between                 |                |                              |             |             |                       |         | 2554.657      | 242    | 0.000   |           |
| Overall                       | 245            | 0.066                        | 0.057       | 0.077       | -32.841               | 0.000   | 799.228       | 2      | 0.000   |           |
|                               |                |                              |             |             |                       |         | 3353.885      | 244    | 0.000   | 92.725    |

Table S3 Prevalence of Gentamicin resistance in blood isolated Enterococcus spp.

| Groups                        |                | Effect size and 95% interval |             |             | Test of null (2-Tail) |         | Heterogeneity |        |         |           |
|-------------------------------|----------------|------------------------------|-------------|-------------|-----------------------|---------|---------------|--------|---------|-----------|
| Group                         | Number Studies | Point estimate               | Lower limit | Upper limit | Z-value               | P-value | Q-value       | df (Q) | P-value | I-squared |
| <b>Mixed effects analysis</b> |                |                              |             |             |                       |         |               |        |         |           |
| E. faecalis                   | 89             | 0.364                        | 0.331       | 0.398       | -7.621                | 0.000   | 1750.396      | 88     | 0.000   | 94.973    |
| E. faecium                    | 53             | 0.465                        | 0.391       | 0.541       | -0.890                | 0.374   | 853.882       | 52     | 0.000   | 93.910    |
| Enterococcus                  | 39             | 0.356                        | 0.306       | 0.410       | -5.088                | 0.000   | 489.642       | 38     | 0.000   | 92.239    |
| Total between                 |                |                              |             |             |                       |         | 3093.920      | 178    | 0.000   |           |
| Overall                       | 181            | 0.375                        | 0.349       | 0.402       | -8.838                | 0.000   | 262.275       | 2      | 0.000   |           |
|                               |                |                              |             |             |                       |         | 3356.195      | 180    | 0.000   | 94.637    |

Table S4 Prevalence of Ampicillin resistance in blood isolated Enterococcus spp.

| Groups                        |                | Effect size and 95% interval |             |             | Test of null (2-Tail) |         | Heterogeneity |        |         |           |
|-------------------------------|----------------|------------------------------|-------------|-------------|-----------------------|---------|---------------|--------|---------|-----------|
| Group                         | Number Studies | Point estimate               | Lower limit | Upper limit | Z-value               | P-value | Q-value       | df (Q) | P-value | I-squared |
| <b>Mixed effects analysis</b> |                |                              |             |             |                       |         |               |        |         |           |
| E. faecalis                   | 48             | 0.040                        | 0.023       | 0.068       | -11.049               | 0.000   | 1417.382      | 47     | 0.000   | 96.684    |
| E. faecium                    | 45             | 0.781                        | 0.732       | 0.824       | 9.277                 | 0.000   | 373.940       | 44     | 0.000   | 88.233    |
| Enterococcus                  | 40             | 0.264                        | 0.218       | 0.315       | -7.990                | 0.000   | 495.883       | 39     | 0.000   | 92.135    |
| Total between                 |                |                              |             |             |                       |         | 2287.205      | 130    | 0.000   |           |
| Overall                       | 133            | 0.435                        | 0.393       | 0.478       | -2.932                | 0.003   | 1928.046      | 2      | 0.000   |           |
|                               |                |                              |             |             |                       |         | 4215.251      | 132    | 0.000   | 96.869    |

Table S5. Prevalence of Teicoplanin resistance in blood isolated Enterococcus spp.

| Groups                        |                | Effect size and 95% interval |             |             | Test of null (2-Tail) |         | Heterogeneity |        |         |           |
|-------------------------------|----------------|------------------------------|-------------|-------------|-----------------------|---------|---------------|--------|---------|-----------|
| Group                         | Number Studies | Point estimate               | Lower limit | Upper limit | Z-value               | P-value | Q-value       | df (Q) | P-value | I-squared |
| <b>Mixed effects analysis</b> |                |                              |             |             |                       |         |               |        |         |           |
| E. faecalis                   | 41             | 0.019                        | 0.012       | 0.029       | -17.887               | 0.000   | 221.278       | 40     | 0.000   | 81.923    |
| E. faecium                    | 36             | 0.146                        | 0.093       | 0.221       | -6.832                | 0.000   | 497.302       | 35     | 0.000   | 92.962    |
| Enterococcus                  | 33             | 0.077                        | 0.057       | 0.104       | -14.860               | 0.000   | 251.749       | 32     | 0.000   | 87.289    |
| Total between                 |                |                              |             |             |                       |         | 970.330       | 107    | 0.000   |           |
| Overall                       | 110            | 0.060                        | 0.048       | 0.074       | -23.262               | 0.000   | 405.455       | 2      | 0.000   |           |
|                               |                |                              |             |             |                       |         | 1375.785      | 109    | 0.000   | 92.077    |

Table S6. Prevalence of Linezolid resistance in blood isolated Enterococcus spp.

| Groups                        |                | Effect size and 95% interval |             |             | Test of null (2-Tail) |         | Heterogeneity |        |         |           |
|-------------------------------|----------------|------------------------------|-------------|-------------|-----------------------|---------|---------------|--------|---------|-----------|
| Group                         | Number Studies | Point estimate               | Lower limit | Upper limit | Z-value               | P-value | Q-value       | df (Q) | P-value | I-squared |
| <b>Mixed effects analysis</b> |                |                              |             |             |                       |         |               |        |         |           |
| E. faecalis                   | 34             | 0.006                        | 0.003       | 0.011       | -16.556               | 0.000   | 133.054       | 33     | 0.000   | 75.198    |
| E. faecium                    | 34             | 0.017                        | 0.010       | 0.028       | -15.431               | 0.000   | 77.265        | 33     | 0.000   | 57.290    |
| Enterococcus                  | 32             | 0.007                        | 0.005       | 0.012       | -19.724               | 0.000   | 46.487        | 31     | 0.037   | 33.315    |
| Total between                 |                |                              |             |             |                       |         | 256.806       | 97     | 0.000   |           |
| Overall                       | 100            | 0.009                        | 0.007       | 0.013       | -29.894               | 0.000   | 21.045        | 2      | 0.000   |           |
|                               |                |                              |             |             |                       |         | 277.851       | 99     | 0.000   | 64.369    |



Table S7. Prevalence of Ciprofloxacin resistance in blood isolated Enterococcus spp.

| Groups                        |                | Effect size and 95% interval |             |             | Test of null (2-Tail) |         | Heterogeneity |        |         |           |
|-------------------------------|----------------|------------------------------|-------------|-------------|-----------------------|---------|---------------|--------|---------|-----------|
| Group                         | Number Studies | Point estimate               | Lower limit | Upper limit | Z-value               | P-value | Q-value       | df (Q) | P-value | I-squared |
| <b>Mixed effects analysis</b> |                |                              |             |             |                       |         |               |        |         |           |
| E. faecalis                   | 40             | 0.435                        | 0.362       | 0.511       | -1.683                | 0.092   | 1137.464      | 39     | 0.000   | 96.571    |
| E. faecium                    | 32             | 0.749                        | 0.691       | 0.799       | 7.429                 | 0.000   | 224.185       | 31     | 0.000   | 86.172    |
| Enterococcus                  | 27             | 0.494                        | 0.418       | 0.570       | -0.146                | 0.884   | 365.332       | 26     | 0.000   | 92.883    |
| Total between                 |                |                              |             |             |                       |         | 1726.981      | 96     | 0.000   |           |
| Overall                       | 99             | 0.575                        | 0.532       | 0.617       | 3.427                 | 0.001   | 516.305       | 2      | 0.000   |           |
|                               |                |                              |             |             |                       |         | 2243.286      | 98     | 0.000   | 95.631    |

Table S8. Prevalence of Streptomycin resistance in blood isolated Enterococcus spp.

| Groups                        |                | Effect size and 95% interval |             |             | Test of null (2-Tail) |         | Heterogeneity |        |         |           |
|-------------------------------|----------------|------------------------------|-------------|-------------|-----------------------|---------|---------------|--------|---------|-----------|
| Group                         | Number Studies | Point estimate               | Lower limit | Upper limit | Z-value               | P-value | Q-value       | df (Q) | P-value | I-squared |
| <b>Mixed effects analysis</b> |                |                              |             |             |                       |         |               |        |         |           |
| E. faecalis                   | 42             | 0.350                        | 0.306       | 0.397       | -6.015                | 0.000   | 637.802       | 41     | 0.000   | 93.572    |
| E. faecium                    | 35             | 0.507                        | 0.422       | 0.592       | 0.161                 | 0.872   | 442.158       | 34     | 0.000   | 92.310    |
| Enterococcus                  | 11             | 0.349                        | 0.255       | 0.456       | -2.731                | 0.006   | 208.117       | 10     | 0.000   | 95.195    |
| Overall                       | 88             | 0.384                        | 0.346       | 0.423       | -5.744                | 0.000   | 1523.631      | 87     | 0.000   | 94.290    |

Table S9. Prevalence of Erythromycin resistance in blood isolated Enterococcus spp.

| Groups                        |                | Effect size and 95% interval |             |             | Test of null (2-Tail) |         | Heterogeneity |        |         |           |
|-------------------------------|----------------|------------------------------|-------------|-------------|-----------------------|---------|---------------|--------|---------|-----------|
| Group                         | Number Studies | Point estimate               | Lower limit | Upper limit | Z-value               | P-value | Q-value       | df (Q) | P-value | I-squared |
| <b>Mixed effects analysis</b> |                |                              |             |             |                       |         |               |        |         |           |
| E. faecalis                   | 27             | 0.698                        | 0.651       | 0.742       | 7.605                 | 0.000   | 315.449       | 26     | 0.000   | 91.758    |
| E. faecium                    | 26             | 0.839                        | 0.790       | 0.878       | 9.988                 | 0.000   | 146.951       | 25     | 0.000   | 82.988    |
| Enterococcus                  | 16             | 0.611                        | 0.469       | 0.737       | 1.535                 | 0.125   | 399.763       | 15     | 0.000   | 96.248    |
| Total between                 |                |                              |             |             |                       |         | 862.162       | 66     | 0.000   |           |
| Overall                       | 69             | 0.737                        | 0.703       | 0.769       | 11.794                | 0.000   | 166.676       | 2      | 0.000   |           |
|                               |                |                              |             |             |                       |         | 1028.838      | 68     | 0.000   | 93.391    |

Table S10. Prevalence of Penicillin resistance in blood isolated Enterococcus spp.

| Groups                        |                | Effect size and 95% interval |             |             | Test of null (2-Tail) |         | Heterogeneity |        |         |           |
|-------------------------------|----------------|------------------------------|-------------|-------------|-----------------------|---------|---------------|--------|---------|-----------|
| Group                         | Number Studies | Point estimate               | Lower limit | Upper limit | Z-value               | P-value | Q-value       | df (Q) | P-value | I-squared |
| <b>Mixed effects analysis</b> |                |                              |             |             |                       |         |               |        |         |           |
| E. faecalis                   | 26             | 0.180                        | 0.119       | 0.264       | -6.052                | 0.000   | 558.925       | 25     | 0.000   | 95.527    |
| E. faecium                    | 24             | 0.854                        | 0.812       | 0.888       | 11.315                | 0.000   | 100.743       | 23     | 0.000   | 77.170    |
| Enterococcus                  | 16             | 0.355                        | 0.265       | 0.455       | -2.798                | 0.005   | 122.877       | 15     | 0.000   | 87.793    |
| Total between                 |                |                              |             |             |                       |         | 782.546       | 63     | 0.000   |           |
| Overall                       | 66             | 0.610                        | 0.556       | 0.661       | 3.963                 | 0.000   | 1174.752      | 2      | 0.000   |           |
|                               |                |                              |             |             |                       |         | 1957.298      | 65     | 0.000   | 96.679    |

Table S11. Prevalence of Chloramphenicol resistance in blood isolated Enterococcus spp.

| Groups                        |                | Effect size and 95% interval |             |             | Test of null (2-Tail) |         | Heterogeneity |        |         |           |
|-------------------------------|----------------|------------------------------|-------------|-------------|-----------------------|---------|---------------|--------|---------|-----------|
| Group                         | Number Studies | Point estimate               | Lower limit | Upper limit | Z-value               | P-value | Q-value       | df (Q) | P-value | I-squared |
| <b>Mixed effects analysis</b> |                |                              |             |             |                       |         |               |        |         |           |
| E. faecalis                   | 19             | 0.302                        | 0.233       | 0.382       | -4.632                | 0.000   | 173.227       | 18     | 0.000   | 89.609    |
| E. faecium                    | 14             | 0.174                        | 0.113       | 0.259       | -6.028                | 0.000   | 60.274        | 13     | 0.000   | 78.432    |
| Enterococcus                  | 29             | 0.263                        | 0.214       | 0.319       | -7.428                | 0.000   | 216.421       | 28     | 0.000   | 87.062    |
| Total between                 |                |                              |             |             |                       |         | 449.922       | 59     | 0.000   |           |
| Overall                       | 62             | 0.259                        | 0.223       | 0.299       | -10.377               | 0.000   | 30.980        | 2      | 0.000   |           |
|                               |                |                              |             |             |                       |         | 480.902       | 61     | 0.000   | 87.316    |

Table S12. Prevalence of levofloxacin resistance in blood isolated Enterococcus spp.

| Groups                        |                | Effect size and 95% interval |             |             | Test of null (2-Tail) |         | Heterogeneity |        |         |           |
|-------------------------------|----------------|------------------------------|-------------|-------------|-----------------------|---------|---------------|--------|---------|-----------|
| Group                         | Number Studies | Point estimate               | Lower limit | Upper limit | Z-value               | P-value | Q-value       | df (Q) | P-value | I-squared |
| <b>Mixed effects analysis</b> |                |                              |             |             |                       |         |               |        |         |           |
| E. faecalis                   | 17             | 0.274                        | 0.218       | 0.339       | -6.275                | 0.000   | 329.940       | 16     | 0.000   | 95.151    |
| E. faecium                    | 17             | 0.793                        | 0.726       | 0.847       | 7.159                 | 0.000   | 83.510        | 16     | 0.000   | 80.841    |
| Enterococcus                  | 20             | 0.391                        | 0.325       | 0.461       | -3.019                | 0.003   | 263.377       | 19     | 0.000   | 92.786    |
| Total between                 |                |                              |             |             |                       |         | 676.827       | 51     | 0.000   |           |
| Overall                       | 54             | 0.451                        | 0.407       | 0.496       | -2.124                | 0.034   | 830.706       | 2      | 0.000   |           |
|                               |                |                              |             |             |                       |         | 1507.533      | 53     | 0.000   | 96.484    |

Table S13. Prevalence of Quinupristin/dalfopristin resistance in blood isolated Enterococcus spp.

| Groups                        |                | Effect size and 95% interval |             |             | Test of null (2-Tail) |         | Heterogeneity |        |         |           |
|-------------------------------|----------------|------------------------------|-------------|-------------|-----------------------|---------|---------------|--------|---------|-----------|
| Group                         | Number Studies | Point estimate               | Lower limit | Upper limit | Z-value               | P-value | Q-value       | df (Q) | P-value | I-squared |
| <b>Mixed effects analysis</b> |                |                              |             |             |                       |         |               |        |         |           |
| E. faecalis                   | 9              | 0.969                        | 0.889       | 0.992       | 4.910                 | 0.000   | 102.477       | 8      | 0.000   | 92.193    |
| E. faecium                    | 23             | 0.081                        | 0.046       | 0.138       | -7.964                | 0.000   | 265.986       | 22     | 0.000   | 91.729    |
| Enterococcus                  | 18             | 0.641                        | 0.536       | 0.734       | 2.608                 | 0.009   | 331.733       | 17     | 0.000   | 94.875    |
| Total between                 |                |                              |             |             |                       |         | 700.196       | 47     | 0.000   |           |
| Overall                       | 50             | 0.444                        | 0.362       | 0.530       | -1.282                | 0.200   | 926.802       | 2      | 0.000   |           |
|                               |                |                              |             |             |                       |         | 1626.997      | 49     | 0.000   | 96.988    |

Table S14. Prevalence of Tetracycline resistance in blood isolated Enterococcus spp.

| Groups                        |                | Effect size and 95% interval |             |             | Test of null (2-Tail) |         | Heterogeneity |        |         |           |
|-------------------------------|----------------|------------------------------|-------------|-------------|-----------------------|---------|---------------|--------|---------|-----------|
| Group                         | Number Studies | Point estimate               | Lower limit | Upper limit | Z-value               | P-value | Q-value       | df (Q) | P-value | I-squared |
| <b>Mixed effects analysis</b> |                |                              |             |             |                       |         |               |        |         |           |
| E. faecalis                   | 21             | 0.815                        | 0.746       | 0.869       | 7.135                 | 0.000   | 378.480       | 20     | 0.000   | 94.716    |
| E. faecium                    | 16             | 0.590                        | 0.492       | 0.681       | 1.810                 | 0.070   | 136.573       | 15     | 0.000   | 89.017    |
| Enterococcus                  | 11             | 0.627                        | 0.573       | 0.677       | 4.544                 | 0.000   | 41.491        | 10     | 0.000   | 75.898    |
| Total between                 |                |                              |             |             |                       |         | 556.544       | 45     | 0.000   |           |
| Overall                       | 48             | 0.661                        | 0.620       | 0.699       | 7.443                 | 0.000   | 236.529       | 2      | 0.000   |           |
|                               |                |                              |             |             |                       |         | 793.073       | 47     | 0.000   | 94.074    |



Table S15. Prevalence of Daptomycin resistance in blood isolated Enterococcus spp.

| Groups                        |                | Effect size and 95% interval |             |             | Test of null (2-Tail) |         | Heterogeneity |        |         |           |
|-------------------------------|----------------|------------------------------|-------------|-------------|-----------------------|---------|---------------|--------|---------|-----------|
| Group                         | Number Studies | Point estimate               | Lower limit | Upper limit | Z-value               | P-value | Q-value       | df (Q) | P-value | I-squared |
| <b>Mixed effects analysis</b> |                |                              |             |             |                       |         |               |        |         |           |
| E. faecalis                   | 11             | 0.002                        | 0.001       | 0.005       | -14.473               | 0.000   | 5.320         | 10     | 0.869   | 0.000     |
| E. faecium                    | 12             | 0.006                        | 0.002       | 0.012       | -12.661               | 0.000   | 3.268         | 11     | 0.987   | 0.000     |
| Enterococcus                  | 17             | 0.005                        | 0.003       | 0.009       | -16.251               | 0.000   | 11.344        | 16     | 0.788   | 0.000     |
| Total between                 |                |                              |             |             |                       |         | 19.932        | 37     | 0.990   |           |
| Overall                       | 40             | 0.004                        | 0.003       | 0.006       | -25.106               | 0.000   | 3.541         | 2      | 0.170   |           |
|                               |                |                              |             |             |                       |         | 23.472        | 39     | 0.977   | 0.000     |

Table S16. Prevalence of Nitrofurantoin resistance in blood isolated Enterococcus spp.

| Groups                        |                | Effect size and 95% interval |             |             | Test of null (2-Tail) |         | Heterogeneity |        |         |           |
|-------------------------------|----------------|------------------------------|-------------|-------------|-----------------------|---------|---------------|--------|---------|-----------|
| Group                         | Number Studies | Point estimate               | Lower limit | Upper limit | Z-value               | P-value | Q-value       | df (Q) | P-value | I-squared |
| <b>Mixed effects analysis</b> |                |                              |             |             |                       |         |               |        |         |           |
| E. faecalis                   | 14             | 0.021                        | 0.008       | 0.056       | -7.436                | 0.000   | 119.399       | 13     | 0.000   | 89.112    |
| E. faecium                    | 14             | 0.431                        | 0.305       | 0.567       | -0.989                | 0.322   | 170.803       | 13     | 0.000   | 92.389    |
| Enterococcus                  | 5              | 0.160                        | 0.094       | 0.261       | -5.267                | 0.000   | 28.616        | 4      | 0.000   | 86.022    |
| Total between                 |                |                              |             |             |                       |         | 318.818       | 30     | 0.000   |           |
| Overall                       | 33             | 0.214                        | 0.157       | 0.285       | -6.718                | 0.000   | 256.431       | 2      | 0.000   |           |
|                               |                |                              |             |             |                       |         | 575.249       | 32     | 0.000   | 94.437    |

Table S17. Prevalence of Amoxicillin/clavuanic acid resistance in blood isolated Enterococcus spp.

| Groups                        |                | Effect size and 95% interval |             |             | Test of null (2-Tail) |         | Heterogeneity |        |         |           |
|-------------------------------|----------------|------------------------------|-------------|-------------|-----------------------|---------|---------------|--------|---------|-----------|
| Group                         | Number Studies | Point estimate               | Lower limit | Upper limit | Z-value               | P-value | Q-value       | df (Q) | P-value | I-squared |
| <b>Mixed effects analysis</b> |                |                              |             |             |                       |         |               |        |         |           |
| E. faecalis                   | 5              | 0.032                        | 0.005       | 0.185       | -3.474                | 0.001   | 24.396        | 4      | 0.000   | 83.604    |
| E. faecium                    | 5              | 0.542                        | 0.352       | 0.720       | 0.421                 | 0.674   | 26.992        | 4      | 0.000   | 85.181    |
| Enterococcus                  | 9              | 0.178                        | 0.089       | 0.323       | -3.779                | 0.000   | 47.225        | 8      | 0.000   | 83.060    |
| Total between                 |                |                              |             |             |                       |         | 98.614        | 16     | 0.000   |           |
| Overall                       | 19             | 0.294                        | 0.196       | 0.415       | -3.215                | 0.001   | 65.839        | 2      | 0.000   |           |
|                               |                |                              |             |             |                       |         | 164.452       | 18     | 0.000   | 89.055    |

Table S18. Prevalence of Imipenem resistance in blood isolated Enterococcus spp.

| Groups                        |                | Effect size and 95% interval |             |             | Test of null (2-Tail) |         | Heterogeneity |        |         |           |
|-------------------------------|----------------|------------------------------|-------------|-------------|-----------------------|---------|---------------|--------|---------|-----------|
| Group                         | Number Studies | Point estimate               | Lower limit | Upper limit | Z-value               | P-value | Q-value       | df (Q) | P-value | I-squared |
| <b>Mixed effects analysis</b> |                |                              |             |             |                       |         |               |        |         |           |
| E. faecalis                   | 6              | 0.049                        | 0.006       | 0.312       | -2.669                | 0.008   | 190.402       | 5      | 0.000   | 97.374    |
| E. faecium                    | 5              | 0.793                        | 0.572       | 0.917       | 2.502                 | 0.012   | 81.402        | 4      | 0.000   | 95.086    |
| Enterococcus                  | 5              | 0.020                        | 0.002       | 0.144       | -3.597                | 0.000   | 21.151        | 4      | 0.000   | 81.088    |
| Total between                 |                |                              |             |             |                       |         | 292.955       | 13     | 0.000   |           |
| Overall                       | 16             | 0.448                        | 0.255       | 0.659       | -0.468                | 0.640   | 318.067       | 2      | 0.000   |           |
|                               |                |                              |             |             |                       |         | 611.022       | 15     | 0.000   | 97.545    |

Table S19. Prevalence of Tigecycline resistance in blood isolated Enterococcus spp.

| Groups                        |                | Effect size and 95% interval |             |             | Test of null (2-Tail) |         | Heterogeneity |        |         |           |
|-------------------------------|----------------|------------------------------|-------------|-------------|-----------------------|---------|---------------|--------|---------|-----------|
| Group                         | Number Studies | Point estimate               | Lower limit | Upper limit | Z-value               | P-value | Q-value       | df (Q) | P-value | I-squared |
| <b>Mixed effects analysis</b> |                |                              |             |             |                       |         |               |        |         |           |
| E. faecalis                   | 4              | 0.005                        | 0.001       | 0.017       | -8.372                | 0.000   | 1.632         | 3      | 0.652   | 0.000     |
| E. faecium                    | 4              | 0.011                        | 0.002       | 0.046       | -5.949                | 0.000   | 5.316         | 3      | 0.150   | 43.563    |
| Enterococcus                  | 3              | 0.001                        | 0.000       | 0.006       | -7.664                | 0.000   | 2.328         | 2      | 0.312   | 14.089    |
| Total between                 |                |                              |             |             |                       |         | 9.275         | 8      | 0.320   |           |
| Overall                       | 11             | 0.005                        | 0.002       | 0.010       | -12.667               | 0.000   | 9.144         | 2      | 0.010   |           |
|                               |                |                              |             |             |                       |         | 18.420        | 10     | 0.048   | 45.710    |

Table S20. Prevalence of Norfloxacin resistance in blood isolated Enterococcus spp.

| Groups                        |                | Effect size and 95% interval |             |             | Test of null (2-Tail) |         | Heterogeneity |        |         |           |
|-------------------------------|----------------|------------------------------|-------------|-------------|-----------------------|---------|---------------|--------|---------|-----------|
| Group                         | Number Studies | Point estimate               | Lower limit | Upper limit | Z-value               | P-value | Q-value       | df (Q) | P-value | I-squared |
| <b>Mixed effects analysis</b> |                |                              |             |             |                       |         |               |        |         |           |
| E. faecalis                   | 3              | 0.234                        | 0.129       | 0.386       | -3.212                | 0.001   | 18.045        | 2      | 0.000   | 88.917    |
| E. faecium                    | 3              | 0.703                        | 0.402       | 0.893       | 1.341                 | 0.180   | 13.369        | 2      | 0.001   | 85.040    |
| Enterococcus                  | 4              | 0.647                        | 0.562       | 0.724       | 3.333                 | 0.001   | 7.102         | 3      | 0.069   | 57.758    |
| Total between                 |                |                              |             |             |                       |         | 38.516        | 7      | 0.000   |           |
| Overall                       | 10             | 0.573                        | 0.496       | 0.647       | 1.851                 | 0.064   | 120.811       | 2      | 0.000   |           |
|                               |                |                              |             |             |                       |         | 159.327       | 9      | 0.000   | 94.351    |

Table S21. Prevalence of Amikacin resistance in blood isolated Enterococcus spp.

| Groups                        |                | Effect size and 95% interval |             |             | Test of null (2-Tail) |         | Heterogeneity |        |         |           |
|-------------------------------|----------------|------------------------------|-------------|-------------|-----------------------|---------|---------------|--------|---------|-----------|
| Group                         | Number Studies | Point estimate               | Lower limit | Upper limit | Z-value               | P-value | Q-value       | df (Q) | P-value | I-squared |
| <b>Mixed effects analysis</b> |                |                              |             |             |                       |         |               |        |         |           |
| E. faecalis                   | 2              | 0.216                        | 0.168       | 0.273       | -8.147                | 0.000   | 0.002         | 1      | 0.965   | 0.000     |
| E. faecium                    | 2              | 0.309                        | 0.206       | 0.435       | -2.896                | 0.004   | 0.912         | 1      | 0.340   | 0.000     |
| Enterococcus                  | 6              | 0.174                        | 0.064       | 0.392       | -2.724                | 0.006   | 42.588        | 5      | 0.000   | 88.260    |
| Total between                 |                |                              |             |             |                       |         | 43.502        | 7      | 0.000   |           |
| Overall                       | 10             | 0.233                        | 0.190       | 0.283       | -8.913                | 0.000   | 2.402         | 2      | 0.301   |           |
|                               |                |                              |             |             |                       |         | 45.904        | 9      | 0.000   | 80.394    |

Table S22. Prevalence of linezolid resistance in blood isolated Enterococcus spp.

| Groups                        |                | Effect size and 95% interval |             |             | Test of null (2-Tail) |         | Heterogeneity |        |         |           |
|-------------------------------|----------------|------------------------------|-------------|-------------|-----------------------|---------|---------------|--------|---------|-----------|
| Group                         | Number Studies | Point estimate               | Lower limit | Upper limit | Z-value               | P-value | Q-value       | df (Q) | P-value | I-squared |
| <b>Mixed effects analysis</b> |                |                              |             |             |                       |         |               |        |         |           |
| E. faecalis                   | 4              | 0.009                        | 0.001       | 0.070       | -4.387                | 0.000   | 7.891         | 3      | 0.048   | 61.980    |
| E. faecium                    | 3              | 0.009                        | 0.002       | 0.043       | -5.757                | 0.000   | 0.092         | 2      | 0.955   | 0.000     |
| Enterococcus                  | 2              | 0.012                        | 0.002       | 0.058       | -5.355                | 0.000   | 0.061         | 1      | 0.804   | 0.000     |
| Total between                 |                |                              |             |             |                       |         | 8.044         | 6      | 0.235   |           |
| Overall                       | 9              | 0.010                        | 0.004       | 0.027       | -8.999                | 0.000   | 0.120         | 2      | 0.942   |           |
|                               |                |                              |             |             |                       |         | 8.164         | 8      | 0.418   | 2.013     |



Table S23. Prevalence of vancomycin resistance in blood isolated *E. faecalis*. by WHO original offices.

| Groups                        |                | Effect size and 95% interval |             |             | Test of null (2-Tail) |         | Heterogeneity |        |         |           |
|-------------------------------|----------------|------------------------------|-------------|-------------|-----------------------|---------|---------------|--------|---------|-----------|
| Group                         | Number Studies | Point estimate               | Lower limit | Upper limit | Z-value               | P-value | Q-value       | df (Q) | P-value | I-squared |
| <b>Mixed effects analysis</b> |                |                              |             |             |                       |         |               |        |         |           |
| Africa                        | 2              | 0.010                        | 0.001       | 0.070       | -4.538                | 0.000   | 0.266         | 1      | 0.606   | 0.000     |
| Americas                      | 9              | 0.045                        | 0.029       | 0.069       | -13.139               | 0.000   | 43.793        | 8      | 0.000   | 81.732    |
| Eastern                       | 11             | 0.049                        | 0.026       | 0.090       | -9.027                | 0.000   | 44.731        | 10     | 0.000   | 77.644    |
| Europe                        | 48             | 0.011                        | 0.008       | 0.016       | -25.209               | 0.000   | 60.344        | 47     | 0.092   | 22.114    |
| South-East                    | 11             | 0.038                        | 0.019       | 0.072       | -9.270                | 0.000   | 26.627        | 10     | 0.003   | 62.444    |
| Western                       | 7              | 0.006                        | 0.001       | 0.046       | -4.887                | 0.000   | 99.515        | 6      | 0.000   | 93.971    |
| Total between                 |                |                              |             |             |                       |         | 275.276       | 82     | 0.000   |           |
| Overall                       | 88             | 0.023                        | 0.018       | 0.029       | -31.374               | 0.000   | 115.144       | 5      | 0.000   |           |
|                               |                |                              |             |             |                       |         | 390.420       | 87     | 0.000   | 77.716    |

Table S24. Prevalence of gentamycin resistance in blood isolated *E. faecalis*. by WHO original offices.

| Groups                        |                | Effect size and 95% interval |             |             | Test of null (2-Tail) |         | Heterogeneity |        |         |           |
|-------------------------------|----------------|------------------------------|-------------|-------------|-----------------------|---------|---------------|--------|---------|-----------|
| Group                         | Number Studies | Point estimate               | Lower limit | Upper limit | Z-value               | P-value | Q-value       | df (Q) | P-value | I-squared |
| <b>Mixed effects analysis</b> |                |                              |             |             |                       |         |               |        |         |           |
| Africa                        | 2              | 0.509                        | 0.416       | 0.603       | 0.196                 | 0.844   | 0.978         | 1      | 0.323   | 0.000     |
| Americas                      | 8              | 0.303                        | 0.278       | 0.330       | -13.318               | 0.000   | 12.753        | 7      | 0.078   | 45.109    |
| Eastern                       | 11             | 0.322                        | 0.253       | 0.399       | -4.354                | 0.000   | 82.945        | 10     | 0.000   | 87.944    |
| Europe                        | 49             | 0.358                        | 0.312       | 0.408       | -5.481                | 0.000   | 1159.817      | 48     | 0.000   | 95.861    |
| South-East                    | 12             | 0.427                        | 0.310       | 0.552       | -1.147                | 0.251   | 153.149       | 11     | 0.000   | 92.817    |
| Western                       | 7              | 0.437                        | 0.337       | 0.542       | -1.179                | 0.238   | 147.313       | 6      | 0.000   | 95.927    |
| Total between                 |                |                              |             |             |                       |         | 1556.954      | 83     | 0.000   |           |
| Overall                       | 89             | 0.337                        | 0.317       | 0.358       | -14.224               | 0.000   | 193.443       | 5      | 0.000   |           |
|                               |                |                              |             |             |                       |         | 1750.396      | 88     | 0.000   | 94.973    |

Table S25. Prevalence of ampicillin resistance in blood isolated *E. faecalis*. by WHO original offices.

| Groups                        |                | Effect size and 95% interval |             |             | Test of null (2-Tail) |         | Heterogeneity |        |         |           |
|-------------------------------|----------------|------------------------------|-------------|-------------|-----------------------|---------|---------------|--------|---------|-----------|
| Group                         | Number Studies | Point estimate               | Lower limit | Upper limit | Z-value               | P-value | Q-value       | df (Q) | P-value | I-squared |
| <b>Mixed effects analysis</b> |                |                              |             |             |                       |         |               |        |         |           |
| Africa                        | 2              | 0.010                        | 0.001       | 0.070       | -4.538                | 0.000   | 0.266         | 1      | 0.606   | 0.000     |
| Americas                      | 9              | 0.014                        | 0.010       | 0.019       | -27.482               | 0.000   | 7.844         | 8      | 0.449   | 0.000     |
| Eastern                       | 7              | 0.117                        | 0.067       | 0.196       | -6.500                | 0.000   | 41.200        | 6      | 0.000   | 85.437    |
| Europe                        | 13             | 0.014                        | 0.006       | 0.029       | -10.726               | 0.000   | 56.066        | 12     | 0.000   | 78.597    |
| South-East                    | 10             | 0.499                        | 0.347       | 0.651       | -0.010                | 0.992   | 191.439       | 9      | 0.000   | 95.299    |
| Western                       | 7              | 0.004                        | 0.002       | 0.011       | -10.994               | 0.000   | 9.424         | 6      | 0.151   | 36.330    |
| Total between                 |                |                              |             |             |                       |         | 306.240       | 42     | 0.000   |           |
| Overall                       | 48             | 0.031                        | 0.025       | 0.039       | -29.472               | 0.000   | 1111.142      | 5      | 0.000   |           |
|                               |                |                              |             |             |                       |         | 1417.382      | 47     | 0.000   | 96.684    |

Table S26. Prevalence of teicoplanin resistance in blood isolated *E. faecalis*, by WHO original offices.

| Groups                        |                | Effect size and 95% interval |             |             | Test of null (2-Tail) |         | Heterogeneity |        |         |           |
|-------------------------------|----------------|------------------------------|-------------|-------------|-----------------------|---------|---------------|--------|---------|-----------|
| Group                         | Number Studies | Point estimate               | Lower limit | Upper limit | Z-value               | P-value | Q-value       | df (Q) | P-value | I-squared |
| <b>Mixed effects analysis</b> |                |                              |             |             |                       |         |               |        |         |           |
| Africa                        | 1              | 0.006                        | 0.000       | 0.091       | -3.582                | 0.000   | 0.000         | 0      | 1.000   | 0.000     |
| Americas                      | 7              | 0.026                        | 0.012       | 0.054       | -9.310                | 0.000   | 30.638        | 6      | 0.000   | 80.417    |
| Eastern                       | 9              | 0.039                        | 0.024       | 0.064       | -12.180               | 0.000   | 20.001        | 8      | 0.010   | 60.001    |
| Europe                        | 17             | 0.010                        | 0.006       | 0.017       | -17.469               | 0.000   | 15.208        | 16     | 0.509   | 0.000     |
| South-East                    | 6              | 0.041                        | 0.008       | 0.188       | -3.665                | 0.000   | 49.023        | 5      | 0.000   | 89.801    |
| Western                       | 1              | 0.042                        | 0.019       | 0.090       | -7.519                | 0.000   | 0.000         | 0      | 1.000   | 0.000     |
| Total between                 |                |                              |             |             |                       |         | 114.869       | 35     | 0.000   |           |
| Overall                       | 41             | 0.023                        | 0.017       | 0.031       | -24.609               | 0.000   | 106.409       | 5      | 0.000   |           |
|                               |                |                              |             |             |                       |         | 221.278       | 40     | 0.000   | 81.923    |

Table S27. Prevalence of linezolid resistance in blood isolated *E. faecalis*. by WHO original offices.

| Groups                        |                | Effect size and 95% interval |             |             | Test of null (2-Tail) |         | Heterogeneity |        |         |           |
|-------------------------------|----------------|------------------------------|-------------|-------------|-----------------------|---------|---------------|--------|---------|-----------|
| Group                         | Number Studies | Point estimate               | Lower limit | Upper limit | Z-value               | P-value | Q-value       | df (Q) | P-value | I-squared |
| <b>Mixed effects analysis</b> |                |                              |             |             |                       |         |               |        |         |           |
| Africa                        | 1              | 0.036                        | 0.005       | 0.214       | -3.236                | 0.001   | 0.000         | 0      | 1.000   | 0.000     |
| Americas                      | 8              | 0.003                        | 0.002       | 0.006       | -17.055               | 0.000   | 3.599         | 7      | 0.825   | 0.000     |
| Eastern                       | 6              | 0.015                        | 0.004       | 0.058       | -5.921                | 0.000   | 21.479        | 5      | 0.001   | 76.722    |
| Europe                        | 9              | 0.004                        | 0.002       | 0.009       | -13.478               | 0.000   | 3.312         | 8      | 0.913   | 0.000     |
| South-East                    | 3              | 0.021                        | 0.002       | 0.218       | -2.938                | 0.003   | 11.859        | 2      | 0.003   | 83.135    |
| Western                       | 7              | 0.005                        | 0.002       | 0.017       | -9.067                | 0.000   | 16.520        | 6      | 0.011   | 63.680    |
| Total between                 |                |                              |             |             |                       |         | 56.769        | 28     | 0.001   |           |
| Overall                       | 34             | 0.005                        | 0.003       | 0.008       | -24.484               | 0.000   | 76.285        | 5      | 0.000   |           |
|                               |                |                              |             |             |                       |         | 133.054       | 33     | 0.000   | 75.198    |

Table S28. Prevalence of vancomycin resistance in blood isolated *E. faecium* by WHO original offices.

| Groups                        |                | Effect size and 95% interval |             |             | Test of null (2-Tail) |         | Heterogeneity |        |         |           |
|-------------------------------|----------------|------------------------------|-------------|-------------|-----------------------|---------|---------------|--------|---------|-----------|
| Group                         | Number Studies | Point estimate               | Lower limit | Upper limit | Z-value               | P-value | Q-value       | df (Q) | P-value | I-squared |
| <b>Mixed effects analysis</b> |                |                              |             |             |                       |         |               |        |         |           |
| Africa                        | 1              | 0.013                        | 0.001       | 0.171       | -3.070                | 0.002   | 0.000         | 0      | 1.000   | 0.000     |
| Americas                      | 10             | 0.403                        | 0.257       | 0.568       | -1.161                | 0.246   | 136.226       | 9      | 0.000   | 93.393    |
| Eastern                       | 11             | 0.232                        | 0.111       | 0.423       | -2.652                | 0.008   | 139.172       | 10     | 0.000   | 92.815    |
| Europe                        | 71             | 0.065                        | 0.049       | 0.086       | -17.301               | 0.000   | 777.279       | 70     | 0.000   | 90.994    |
| South-East                    | 10             | 0.059                        | 0.021       | 0.153       | -5.122                | 0.000   | 47.696        | 9      | 0.000   | 81.130    |
| Western                       | 7              | 0.205                        | 0.118       | 0.332       | -4.058                | 0.000   | 57.311        | 6      | 0.000   | 89.531    |
| Total between                 |                |                              |             |             |                       |         | 1157.684      | 104    | 0.000   |           |
| Overall                       | 110            | 0.107                        | 0.087       | 0.132       | -17.561               | 0.000   | 590.090       | 5      | 0.000   |           |
|                               |                |                              |             |             |                       |         | 1747.774      | 109    | 0.000   | 93.763    |

Table S29. Prevalence of gentamicin resistance in blood isolated *E. faecium* by WHO original offices.

| Groups                        |                | Effect size and 95% interval |             |             | Test of null (2-Tail) |         | Heterogeneity |        |         |           |
|-------------------------------|----------------|------------------------------|-------------|-------------|-----------------------|---------|---------------|--------|---------|-----------|
| Group                         | Number Studies | Point estimate               | Lower limit | Upper limit | Z-value               | P-value | Q-value       | df (Q) | P-value | I-squared |
| <b>Mixed effects analysis</b> |                |                              |             |             |                       |         |               |        |         |           |
| Africa                        | 1              | 0.615                        | 0.456       | 0.753       | 1.428                 | 0.153   | 0.000         | 0      | 1.000   | 0.000     |
| Americas                      | 8              | 0.278                        | 0.152       | 0.453       | -2.444                | 0.015   | 81.818        | 7      | 0.000   | 91.444    |
| Eastern                       | 10             | 0.389                        | 0.200       | 0.619       | -0.942                | 0.346   | 145.375       | 9      | 0.000   | 93.809    |
| Europe                        | 17             | 0.420                        | 0.280       | 0.574       | -1.022                | 0.307   | 360.628       | 16     | 0.000   | 95.563    |
| South-East                    | 12             | 0.497                        | 0.356       | 0.638       | -0.041                | 0.967   | 93.007        | 11     | 0.000   | 88.173    |
| Western                       | 7              | 0.655                        | 0.532       | 0.760       | 2.453                 | 0.014   | 63.091        | 6      | 0.000   | 90.490    |
| Total between                 |                |                              |             |             |                       |         | 743.919       | 49     | 0.000   |           |
| Overall                       | 55             | 0.510                        | 0.444       | 0.574       | 0.287                 | 0.774   | 141.876       | 5      | 0.000   |           |
|                               |                |                              |             |             |                       |         | 885.796       | 54     | 0.000   | 93.904    |

Table S30. Prevalence of ampicillin resistance in blood isolated *E. faecium* by WHO original offices.

| Groups                        |                | Effect size and 95% interval |             |             | Test of null (2-Tail) |         | Heterogeneity |        |         |           |
|-------------------------------|----------------|------------------------------|-------------|-------------|-----------------------|---------|---------------|--------|---------|-----------|
| Group                         | Number Studies | Point estimate               | Lower limit | Upper limit | Z-value               | P-value | Q-value       | df (Q) | P-value | I-squared |
| <b>Mixed effects analysis</b> |                |                              |             |             |                       |         |               |        |         |           |
| Africa                        | 1              | 0.949                        | 0.817       | 0.987       | 4.019                 | 0.000   | 0.000         | 0      | 1.000   | 0.000     |
| Americas                      | 9              | 0.814                        | 0.764       | 0.856       | 9.606                 | 0.000   | 16.918        | 8      | 0.031   | 52.713    |
| Eastern                       | 7              | 0.645                        | 0.497       | 0.770       | 1.923                 | 0.054   | 30.334        | 6      | 0.000   | 80.220    |
| Europe                        | 14             | 0.835                        | 0.782       | 0.877       | 9.232                 | 0.000   | 50.363        | 13     | 0.000   | 74.188    |
| South-East                    | 9              | 0.506                        | 0.362       | 0.648       | 0.075                 | 0.940   | 48.544        | 8      | 0.000   | 83.520    |
| Western                       | 7              | 0.862                        | 0.791       | 0.912       | 7.097                 | 0.000   | 25.234        | 6      | 0.000   | 76.223    |
| Total between                 |                |                              |             |             |                       |         | 171.394       | 41     | 0.000   |           |
| Overall                       | 47             | 0.797                        | 0.765       | 0.825       | 14.534                | 0.000   | 248.662       | 5      | 0.000   |           |
|                               |                |                              |             |             |                       |         | 420.057       | 46     | 0.000   | 89.049    |



Table S31. Prevalence of teicoplanin resistance in blood isolated *E. faecium* by WHO original offices.

| Groups                        |                | Effect size and 95% interval |             |             | Test of null (2-Tail) |         | Heterogeneity |        |         |           |
|-------------------------------|----------------|------------------------------|-------------|-------------|-----------------------|---------|---------------|--------|---------|-----------|
| Group                         | Number Studies | Point estimate               | Lower limit | Upper limit | Z-value               | P-value | Q-value       | df (Q) | P-value | I-squared |
| <b>Mixed effects analysis</b> |                |                              |             |             |                       |         |               |        |         |           |
| Africa                        | 1              | 0.013                        | 0.001       | 0.171       | -3.070                | 0.002   | 0.000         | 0      | 1.000   | 0.000     |
| Americas                      | 7              | 0.292                        | 0.139       | 0.512       | -1.861                | 0.063   | 74.018        | 6      | 0.000   | 91.894    |
| Eastern                       | 10             | 0.197                        | 0.084       | 0.396       | -2.806                | 0.005   | 130.545       | 9      | 0.000   | 93.106    |
| Europe                        | 12             | 0.081                        | 0.041       | 0.154       | -6.579                | 0.000   | 85.642        | 11     | 0.000   | 87.156    |
| South-East                    | 7              | 0.078                        | 0.025       | 0.222       | -3.982                | 0.000   | 41.395        | 6      | 0.000   | 85.506    |
| Western                       | 1              | 0.211                        | 0.109       | 0.368       | -3.322                | 0.001   | 0.000         | 0      | 1.000   | 0.000     |
| Total between                 |                |                              |             |             |                       |         | 331.601       | 32     | 0.000   |           |
| Overall                       | 38             | 0.147                        | 0.104       | 0.203       | -8.829                | 0.000   | 188.519       | 5      | 0.000   |           |
|                               |                |                              |             |             |                       |         | 520.120       | 37     | 0.000   | 92.886    |

Table S32. Prevalence of linezolid resistance in blood isolated *E. faecium* by WHO original offices.

| Groups                        |                | Effect size and 95% interval |             |             | Test of null (2-Tail) |         | Heterogeneity |        |         |           |
|-------------------------------|----------------|------------------------------|-------------|-------------|-----------------------|---------|---------------|--------|---------|-----------|
| Group                         | Number Studies | Point estimate               | Lower limit | Upper limit | Z-value               | P-value | Q-value       | df (Q) | P-value | I-squared |
| <b>Mixed effects analysis</b> |                |                              |             |             |                       |         |               |        |         |           |
| Americas                      | 8              | 0.008                        | 0.004       | 0.020       | -10.582               | 0.000   | 3.045         | 7      | 0.881   | 0.000     |
| Eastern                       | 7              | 0.031                        | 0.012       | 0.077       | -6.978                | 0.000   | 10.182        | 6      | 0.117   | 41.072    |
| Europe                        | 10             | 0.013                        | 0.007       | 0.025       | -12.792               | 0.000   | 9.442         | 9      | 0.397   | 4.683     |
| South-East                    | 4              | 0.041                        | 0.018       | 0.089       | -7.444                | 0.000   | 3.330         | 3      | 0.343   | 9.918     |
| Western                       | 7              | 0.014                        | 0.003       | 0.068       | -5.108                | 0.000   | 37.709        | 6      | 0.000   | 84.089    |
| Total between                 |                |                              |             |             |                       |         | 63.708        | 31     | 0.000   |           |
| Overall                       | 36             | 0.018                        | 0.012       | 0.027       | -19.918               | 0.000   | 17.760        | 4      | 0.001   |           |
|                               |                |                              |             |             |                       |         | 81.468        | 35     | 0.000   | 57.038    |

Table S33. Prevalence of vancomycin resistance in blood isolated *E. faecalis* by study time groups.

| Groups                        |                | Effect size and 95% interval |             |             | Test of null (2-Tail) |         | Heterogeneity |        |         |           |
|-------------------------------|----------------|------------------------------|-------------|-------------|-----------------------|---------|---------------|--------|---------|-----------|
| Group                         | Number Studies | Point estimate               | Lower limit | Upper limit | Z-value               | P-value | Q-value       | df (Q) | P-value | I-squared |
| <b>Mixed effects analysis</b> |                |                              |             |             |                       |         |               |        |         |           |
| 2000-2005                     | 25             | 0.010                        | 0.005       | 0.019       | -13.835               | 0.000   | 100.408       | 24     | 0.000   | 76.097    |
| 2005-2010                     | 37             | 0.022                        | 0.015       | 0.032       | -19.559               | 0.000   | 130.387       | 36     | 0.000   | 72.390    |
| 2010-2016                     | 24             | 0.027                        | 0.015       | 0.049       | -11.442               | 0.000   | 124.667       | 23     | 0.000   | 81.551    |
| Total between                 |                |                              |             |             |                       |         | 355.461       | 83     | 0.000   |           |
| Overall                       | 86             | 0.020                        | 0.015       | 0.026       | -26.442               | 0.000   | 32.198        | 2      | 0.000   |           |
|                               |                |                              |             |             |                       |         | 387.659       | 85     | 0.000   | 78.074    |

Table S34. Prevalence of gentamycin resistance in blood isolated *E. faecalis* by study time groups.

| Groups                        |                | Effect size and 95% interval |             |             | Test of null (2-Tail) |         | Heterogeneity |        |         |           |
|-------------------------------|----------------|------------------------------|-------------|-------------|-----------------------|---------|---------------|--------|---------|-----------|
| Group                         | Number Studies | Point estimate               | Lower limit | Upper limit | Z-value               | P-value | Q-value       | df (Q) | P-value | I-squared |
| <b>Mixed effects analysis</b> |                |                              |             |             |                       |         |               |        |         |           |
| 2000-2005                     | 21             | 0.365                        | 0.284       | 0.454       | -2.948                | 0.003   | 476.206       | 20     | 0.000   | 95.800    |
| 2005-2010                     | 23             | 0.397                        | 0.342       | 0.454       | -3.504                | 0.000   | 306.029       | 22     | 0.000   | 92.811    |
| 2010-2016                     | 43             | 0.345                        | 0.301       | 0.391       | -6.253                | 0.000   | 872.640       | 42     | 0.000   | 95.187    |
| Total between                 |                |                              |             |             |                       |         | 1654.875      | 84     | 0.000   |           |
| Overall                       | 87             | 0.366                        | 0.334       | 0.400       | -7.620                | 0.000   | 84.927        | 2      | 0.000   |           |
|                               |                |                              |             |             |                       |         | 1739.802      | 86     | 0.000   | 95.057    |

Table S35. Prevalence of ampicillin resistance in blood isolated *E. faecalis* by study time groups.

| Groups                        |                | Effect size and 95% interval |             |             | Test of null (2-Tail) |         | Heterogeneity |        |         |           |
|-------------------------------|----------------|------------------------------|-------------|-------------|-----------------------|---------|---------------|--------|---------|-----------|
| Group                         | Number Studies | Point estimate               | Lower limit | Upper limit | Z-value               | P-value | Q-value       | df (Q) | P-value | I-squared |
| <b>Mixed effects analysis</b> |                |                              |             |             |                       |         |               |        |         |           |
| 2000-2005                     | 17             | 0.040                        | 0.017       | 0.090       | -7.191                | 0.000   | 492.540       | 16     | 0.000   | 96.752    |
| 2005-2010                     | 14             | 0.021                        | 0.007       | 0.060       | -6.949                | 0.000   | 377.020       | 13     | 0.000   | 96.552    |
| 2010-2016                     | 15             | 0.091                        | 0.037       | 0.209       | -4.639                | 0.000   | 245.987       | 14     | 0.000   | 94.309    |
| Total between                 |                |                              |             |             |                       |         | 1115.547      | 43     | 0.000   |           |
| Overall                       | 46             | 0.044                        | 0.026       | 0.075       | -10.822               | 0.000   | 290.602       | 2      | 0.000   |           |
|                               |                |                              |             |             |                       |         | 1406.149      | 45     | 0.000   | 96.800    |

Table S36. Prevalence of teicoplanin resistance in blood isolated *E. faecalis* by study time groups.

| Groups                        |                | Effect size and 95% interval |             |             | Test of null (2-Tail) |         | Heterogeneity |        |         |           |
|-------------------------------|----------------|------------------------------|-------------|-------------|-----------------------|---------|---------------|--------|---------|-----------|
| Group                         | Number Studies | Point estimate               | Lower limit | Upper limit | Z-value               | P-value | Q-value       | df (Q) | P-value | I-squared |
| <b>Mixed effects analysis</b> |                |                              |             |             |                       |         |               |        |         |           |
| 2000-2005                     | 9              | 0.009                        | 0.004       | 0.020       | -10.941               | 0.000   | 11.523        | 8      | 0.174   | 30.571    |
| 2005-2010                     | 19             | 0.018                        | 0.009       | 0.036       | -11.497               | 0.000   | 142.323       | 18     | 0.000   | 87.353    |
| 2010-2016                     | 13             | 0.044                        | 0.024       | 0.079       | -9.717                | 0.000   | 45.139        | 12     | 0.000   | 73.415    |
| Total between                 |                |                              |             |             |                       |         | 198.984       | 38     | 0.000   |           |
| Overall                       | 41             | 0.023                        | 0.015       | 0.033       | -18.332               | 0.000   | 42.981        | 2      | 0.000   |           |
|                               |                |                              |             |             |                       |         | 241.965       | 40     | 0.000   | 83.469    |

Table S37. Prevalence of linezolid resistance in blood isolated *E. faecalis* by study time groups.

| Groups                        |                | Effect size and 95% interval |             |             | Test of null (2-Tail) |         | Heterogeneity |        |         |           |
|-------------------------------|----------------|------------------------------|-------------|-------------|-----------------------|---------|---------------|--------|---------|-----------|
| Group                         | Number Studies | Point estimate               | Lower limit | Upper limit | Z-value               | P-value | Q-value       | df (Q) | P-value | I-squared |
| <b>Mixed effects analysis</b> |                |                              |             |             |                       |         |               |        |         |           |
| 2000-2005                     | 6              | 0.003                        | 0.001       | 0.008       | -10.968               | 0.000   | 1.602         | 5      | 0.901   | 0.000     |
| 2005-2010                     | 15             | 0.004                        | 0.001       | 0.010       | -10.755               | 0.000   | 54.833        | 14     | 0.000   | 74.468    |
| 2010-2016                     | 13             | 0.021                        | 0.008       | 0.054       | -7.894                | 0.000   | 71.107        | 12     | 0.000   | 83.124    |
| Total between                 |                |                              |             |             |                       |         | 127.542       | 31     | 0.000   |           |
| Overall                       | 34             | 0.007                        | 0.004       | 0.012       | -16.980               | 0.000   | 46.242        | 2      | 0.000   |           |
|                               |                |                              |             |             |                       |         | 173.784       | 33     | 0.000   | 81.011    |

Table S38. Prevalence of vancomycin resistance in blood isolated *E. faecium* by study time groups.

| Groups                        |                | Effect size and 95% interval |             |             | Test of null (2-Tail) |         | Heterogeneity |        |         |           |
|-------------------------------|----------------|------------------------------|-------------|-------------|-----------------------|---------|---------------|--------|---------|-----------|
| Group                         | Number Studies | Point estimate               | Lower limit | Upper limit | Z-value               | P-value | Q-value       | df (Q) | P-value | I-squared |
| <b>Mixed effects analysis</b> |                |                              |             |             |                       |         |               |        |         |           |
| 2000-2005                     | 24             | 0.082                        | 0.052       | 0.126       | -9.794                | 0.000   | 119.681       | 23     | 0.000   | 80.782    |
| 2005-2010                     | 62             | 0.089                        | 0.064       | 0.123       | -12.667               | 0.000   | 1255.061      | 61     | 0.000   | 95.140    |
| 2010-2016                     | 21             | 0.218                        | 0.137       | 0.327       | -4.490                | 0.000   | 184.315       | 20     | 0.000   | 89.149    |
| Total between                 |                |                              |             |             |                       |         | 1559.057      | 104    | 0.000   |           |
| Overall                       | 107            | 0.106                        | 0.084       | 0.133       | -16.283               | 0.000   | 164.754       | 2      | 0.000   |           |
|                               |                |                              |             |             |                       |         | 1723.812      | 106    | 0.000   | 93.851    |



Table S39. Prevalence of gentamycin resistance in blood isolated *E. faecium* by study time groups.

| Groups                        |                | Effect size and 95% interval |             |             | Test of null (2-Tail) |         | Heterogeneity |        |         |           |
|-------------------------------|----------------|------------------------------|-------------|-------------|-----------------------|---------|---------------|--------|---------|-----------|
| Group                         | Number Studies | Point estimate               | Lower limit | Upper limit | Z-value               | P-value | Q-value       | df (Q) | P-value | I-squared |
| <b>Mixed effects analysis</b> |                |                              |             |             |                       |         |               |        |         |           |
| 2000-2005                     | 20             | 0.424                        | 0.279       | 0.584       | -0.929                | 0.353   | 378.867       | 19     | 0.000   | 94.985    |
| 2005-2010                     | 20             | 0.437                        | 0.339       | 0.541       | -1.187                | 0.235   | 261.908       | 19     | 0.000   | 92.746    |
| 2010-2016                     | 12             | 0.575                        | 0.421       | 0.716       | 0.958                 | 0.338   | 170.244       | 11     | 0.000   | 93.539    |
| Total between                 |                |                              |             |             |                       |         | 811.019       | 49     | 0.000   |           |
| Overall                       | 52             | 0.467                        | 0.393       | 0.543       | -0.839                | 0.401   | 41.509        | 2      | 0.000   |           |
|                               |                |                              |             |             |                       |         | 852.528       | 51     | 0.000   | 94.018    |

Table S40. Prevalence of ampicillin resistance in blood isolated *E. faecium* by study time groups.

| Groups                        |                | Effect size and 95% interval |             |             | Test of null (2-Tail) |         | Heterogeneity |        |         |           |
|-------------------------------|----------------|------------------------------|-------------|-------------|-----------------------|---------|---------------|--------|---------|-----------|
| Group                         | Number Studies | Point estimate               | Lower limit | Upper limit | Z-value               | P-value | Q-value       | df (Q) | P-value | I-squared |
| <b>Mixed effects analysis</b> |                |                              |             |             |                       |         |               |        |         |           |
| 2000-2005                     | 16             | 0.746                        | 0.649       | 0.823       | 4.580                 | 0.000   | 124.163       | 15     | 0.000   | 87.919    |
| 2005-2010                     | 17             | 0.808                        | 0.751       | 0.854       | 8.460                 | 0.000   | 94.906        | 16     | 0.000   | 83.141    |
| 2010-2016                     | 11             | 0.766                        | 0.618       | 0.869       | 3.295                 | 0.001   | 108.934       | 10     | 0.000   | 90.820    |
| Total between                 |                |                              |             |             |                       |         | 328.004       | 41     | 0.000   |           |
| Overall                       | 44             | 0.785                        | 0.740       | 0.825       | 10.088                | 0.000   | 40.559        | 2      | 0.000   |           |
|                               |                |                              |             |             |                       |         | 368.563       | 43     | 0.000   | 88.333    |

Table S41. Prevalence of teicoplanin resistance in blood isolated *E. faecium* by study time groups.

| Groups                        |                | Effect size and 95% interval |             |             | Test of null (2-Tail) |         | Heterogeneity |        |         |           |
|-------------------------------|----------------|------------------------------|-------------|-------------|-----------------------|---------|---------------|--------|---------|-----------|
| Group                         | Number Studies | Point estimate               | Lower limit | Upper limit | Z-value               | P-value | Q-value       | df (Q) | P-value | I-squared |
| <b>Mixed effects analysis</b> |                |                              |             |             |                       |         |               |        |         |           |
| 2000-2005                     | 9              | 0.112                        | 0.068       | 0.177       | -7.547                | 0.000   | 18.825        | 8      | 0.016   | 57.504    |
| 2005-2010                     | 15             | 0.131                        | 0.063       | 0.254       | -4.562                | 0.000   | 251.261       | 14     | 0.000   | 94.428    |
| 2010-2016                     | 11             | 0.243                        | 0.119       | 0.433       | -2.572                | 0.010   | 138.770       | 10     | 0.000   | 92.794    |
| Total between                 |                |                              |             |             |                       |         | 408.856       | 32     | 0.000   |           |
| Overall                       | 35             | 0.138                        | 0.097       | 0.193       | -9.007                | 0.000   | 82.074        | 2      | 0.000   |           |
|                               |                |                              |             |             |                       |         | 490.930       | 34     | 0.000   | 93.074    |

Table S42. Prevalence of vancomycin resistance in blood isolated *E. faecalis* by country.

| Group                         | Number Studies | Point estimate | Lower limit | Upper limit | Z-value | P-value | Q-value | df (Q) | P-value | I-squared |
|-------------------------------|----------------|----------------|-------------|-------------|---------|---------|---------|--------|---------|-----------|
| <b>Mixed effects analysis</b> |                |                |             |             |         |         |         |        |         |           |
| Algeria                       | 1              | 0.006          | 0.000       | 0.091       | -3.582  | 0.000   | 0.000   | 0      | 1.000   | 0.000     |
| Argentina                     | 1              | 0.008          | 0.002       | 0.032       | -6.754  | 0.000   | 0.000   | 0      | 1.000   | 0.000     |
| Australia                     | 1              | 0.005          | 0.001       | 0.014       | -9.308  | 0.000   | 0.000   | 0      | 1.000   | 0.000     |
| Brazil                        | 2              | 0.077          | 0.064       | 0.091       | -25.307 | 0.000   | 0.000   | 1      | 0.986   | 0.000     |
| Chile                         | 1              | 0.011          | 0.004       | 0.033       | -7.770  | 0.000   | 0.000   | 0      | 1.000   | 0.000     |
| Colombia                      | 1              | 0.050          | 0.021       | 0.113       | -6.442  | 0.000   | 0.000   | 0      | 1.000   | 0.000     |
| Cuba                          | 1              | 0.012          | 0.002       | 0.080       | -4.392  | 0.000   | 0.000   | 0      | 1.000   | 0.000     |
| Denmark                       | 2              | 0.008          | 0.002       | 0.037       | -5.930  | 0.000   | 0.161   | 1      | 0.688   | 0.000     |
| Egypt                         | 1              | 0.071          | 0.030       | 0.160       | -5.527  | 0.000   | 0.000   | 0      | 1.000   | 0.000     |
| France                        | 3              | 0.012          | 0.002       | 0.058       | -5.336  | 0.000   | 3.206   | 2      | 0.201   | 37.613    |
| Germany                       | 1              | 0.004          | 0.000       | 0.064       | -3.852  | 0.000   | 0.000   | 0      | 1.000   | 0.000     |
| Greece                        | 15             | 0.008          | 0.004       | 0.013       | -17.485 | 0.000   | 5.828   | 14     | 0.971   | 0.000     |
| India                         | 10             | 0.032          | 0.016       | 0.061       | -9.884  | 0.000   | 17.916  | 9      | 0.036   | 49.764    |
| Iran                          | 8              | 0.060          | 0.029       | 0.119       | -7.152  | 0.000   | 36.315  | 7      | 0.000   | 80.724    |
| Ireland                       | 1              | 0.013          | 0.001       | 0.175       | -3.052  | 0.002   | 0.000   | 0      | 1.000   | 0.000     |
| Israel                        | 2              | 0.009          | 0.001       | 0.059       | -4.712  | 0.000   | 0.246   | 1      | 0.620   | 0.000     |
| Italy                         | 2              | 0.012          | 0.007       | 0.022       | -15.099 | 0.000   | 0.091   | 1      | 0.763   | 0.000     |
| Japan                         | 1              | 0.181          | 0.126       | 0.252       | -6.982  | 0.000   | 0.000   | 0      | 1.000   | 0.000     |
| Kenya                         | 1              | 0.017          | 0.001       | 0.223       | -2.834  | 0.005   | 0.000   | 0      | 1.000   | 0.000     |
| Mexico                        | 1              | 0.002          | 0.000       | 0.024       | -4.577  | 0.000   | 0.000   | 0      | 1.000   | 0.000     |
| Nepal                         | 1              | 0.110          | 0.056       | 0.204       | -5.591  | 0.000   | 0.000   | 0      | 1.000   | 0.000     |
| Netherlands                   | 1              | 0.008          | 0.001       | 0.120       | -3.365  | 0.001   | 0.000   | 0      | 1.000   | 0.000     |
| Norway                        | 1              | 0.016          | 0.001       | 0.211       | -2.883  | 0.004   | 0.000   | 0      | 1.000   | 0.000     |
| Poland                        | 8              | 0.009          | 0.003       | 0.022       | -9.993  | 0.000   | 0.743   | 7      | 0.998   | 0.000     |
| Saudi Arabia                  | 1              | 0.018          | 0.006       | 0.055       | -6.857  | 0.000   | 0.000   | 0      | 1.000   | 0.000     |
| Spain                         | 4              | 0.008          | 0.002       | 0.027       | -7.584  | 0.000   | 2.338   | 3      | 0.505   | 0.000     |
| Sweden                        | 2              | 0.002          | 0.000       | 0.017       | -6.001  | 0.000   | 0.556   | 1      | 0.456   | 0.000     |
| Switzerland                   | 1              | 0.023          | 0.001       | 0.277       | -2.629  | 0.009   | 0.000   | 0      | 1.000   | 0.000     |
| Taiwan                        | 5              | 0.004          | 0.002       | 0.008       | -13.161 | 0.000   | 1.175   | 4      | 0.882   | 0.000     |
| Tunis                         | 1              | 0.004          | 0.000       | 0.054       | -3.975  | 0.000   | 0.000   | 0      | 1.000   | 0.000     |
| Turkey                        | 3              | 0.005          | 0.001       | 0.026       | -6.386  | 0.000   | 0.478   | 2      | 0.787   | 0.000     |
| UK                            | 2              | 0.075          | 0.012       | 0.354       | -2.578  | 0.010   | 8.420   | 1      | 0.004   | 88.124    |
| USA                           | 2              | 0.074          | 0.030       | 0.173       | -5.134  | 0.000   | 10.814  | 1      | 0.001   | 90.753    |

Table S43. Prevalence of vancomycin resistance in blood isolated *E. faecium* by country.

| Group        | Number Studies | Point estimate | Lower limit | Upper limit | Z-value | P-value | Q-value | df (Q) | P-value | I-squared |
|--------------|----------------|----------------|-------------|-------------|---------|---------|---------|--------|---------|-----------|
| Algeria      | 1              | 0.013          | 0.001       | 0.171       | -3.070  | 0.002   | 0.000   | 0      | 1.000   | 0.000     |
| Argentina    | 1              | 0.365          | 0.247       | 0.503       | -1.917  | 0.055   | 0.000   | 0      | 1.000   | 0.000     |
| Australia    | 1              | 0.365          | 0.318       | 0.415       | -5.150  | 0.000   | 0.000   | 0      | 1.000   | 0.000     |
| Austria      | 1              | 0.032          | 0.018       | 0.055       | -11.630 | 0.000   | 0.000   | 0      | 1.000   | 0.000     |
| Belgium      | 1              | 0.014          | 0.005       | 0.043       | -7.298  | 0.000   | 0.000   | 0      | 1.000   | 0.000     |
| Brazil       | 2              | 0.673          | 0.612       | 0.729       | 5.336   | 0.000   | 0.215   | 1      | 0.643   | 0.000     |
| Bulgaria     | 1              | 0.012          | 0.001       | 0.160       | -3.123  | 0.002   | 0.000   | 0      | 1.000   | 0.000     |
| Canada       | 1              | 0.171          | 0.119       | 0.239       | -7.327  | 0.000   | 0.000   | 0      | 1.000   | 0.000     |
| Chile        | 1              | 0.407          | 0.285       | 0.542       | -1.353  | 0.176   | 0.000   | 0      | 1.000   | 0.000     |
| Colombia     | 1              | 0.389          | 0.198       | 0.621       | -0.935  | 0.350   | 0.000   | 0      | 1.000   | 0.000     |
| Croatia      | 1              | 0.008          | 0.001       | 0.116       | -3.389  | 0.001   | 0.000   | 0      | 1.000   | 0.000     |
| Cuba         | 1              | 0.100          | 0.014       | 0.467       | -2.084  | 0.037   | 0.000   | 0      | 1.000   | 0.000     |
| Cyprus       | 1              | 0.103          | 0.034       | 0.276       | -3.542  | 0.000   | 0.000   | 0      | 1.000   | 0.000     |
| Czech        | 1              | 0.115          | 0.081       | 0.159       | -10.543 | 0.000   | 0.000   | 0      | 1.000   | 0.000     |
| Denmark      | 2              | 0.019          | 0.011       | 0.033       | -14.053 | 0.000   | 0.480   | 1      | 0.488   | 0.000     |
| Egypt        | 2              | 0.133          | 0.032       | 0.419       | -2.373  | 0.018   | 4.005   | 1      | 0.045   | 75.034    |
| Estonia      | 1              | 0.012          | 0.001       | 0.167       | -3.088  | 0.002   | 0.000   | 0      | 1.000   | 0.000     |
| Finland      | 1              | 0.007          | 0.002       | 0.029       | -6.922  | 0.000   | 0.000   | 0      | 1.000   | 0.000     |
| France       | 4              | 0.010          | 0.004       | 0.021       | -11.741 | 0.000   | 0.920   | 3      | 0.821   | 0.000     |
| Germany      | 2              | 0.163          | 0.137       | 0.191       | -16.231 | 0.000   | 0.002   | 1      | 0.963   | 0.000     |
| Greece       | 16             | 0.105          | 0.081       | 0.136       | -14.420 | 0.000   | 22.564  | 15     | 0.094   | 33.522    |
| Hungary      | 1              | 0.035          | 0.015       | 0.082       | -7.271  | 0.000   | 0.000   | 0      | 1.000   | 0.000     |
| Iceland      | 1              | 0.033          | 0.002       | 0.366       | -2.341  | 0.019   | 0.000   | 0      | 1.000   | 0.000     |
| India        | 8              | 0.081          | 0.029       | 0.209       | -4.350  | 0.000   | 36.045  | 7      | 0.000   | 80.580    |
| Iran         | 6              | 0.436          | 0.208       | 0.696       | -0.463  | 0.643   | 92.973  | 5      | 0.000   | 94.622    |
| Ireland      | 2              | 0.548          | 0.288       | 0.784       | 0.343   | 0.732   | 3.705   | 1      | 0.054   | 73.012    |
| Israel       | 2              | 0.134          | 0.006       | 0.807       | -1.109  | 0.268   | 4.700   | 1      | 0.030   | 78.725    |
| Italy        | 3              | 0.133          | 0.053       | 0.297       | -3.632  | 0.000   | 32.550  | 2      | 0.000   | 93.856    |
| Japan        | 1              | 0.579          | 0.419       | 0.724       | 0.969   | 0.332   | 0.000   | 0      | 1.000   | 0.000     |
| Latvia       | 1              | 0.056          | 0.008       | 0.307       | -2.753  | 0.006   | 0.000   | 0      | 1.000   | 0.000     |
| Lithuania    | 1              | 0.056          | 0.014       | 0.197       | -3.894  | 0.000   | 0.000   | 0      | 1.000   | 0.000     |
| Luxembourg   | 1              | 0.024          | 0.001       | 0.287       | -2.594  | 0.009   | 0.000   | 0      | 1.000   | 0.000     |
| Mexico       | 1              | 0.004          | 0.000       | 0.058       | -3.927  | 0.000   | 0.000   | 0      | 1.000   | 0.000     |
| Nepal        | 1              | 0.040          | 0.006       | 0.235       | -3.114  | 0.002   | 0.000   | 0      | 1.000   | 0.000     |
| Netherlands  | 1              | 0.001          | 0.000       | 0.016       | -4.860  | 0.000   | 0.000   | 0      | 1.000   | 0.000     |
| Norway       | 1              | 0.006          | 0.001       | 0.041       | -5.103  | 0.000   | 0.000   | 0      | 1.000   | 0.000     |
| Poland       | 9              | 0.055          | 0.022       | 0.128       | -6.004  | 0.000   | 53.468  | 8      | 0.000   | 85.038    |
| Portugal     | 1              | 0.233          | 0.186       | 0.289       | -8.063  | 0.000   | 0.000   | 0      | 1.000   | 0.000     |
| Saudi Arabia | 1              | 0.185          | 0.079       | 0.375       | -2.991  | 0.003   | 0.000   | 0      | 1.000   | 0.000     |
| Slovakia     | 1              | 0.049          | 0.018       | 0.123       | -5.794  | 0.000   | 0.000   | 0      | 1.000   | 0.000     |
| Slovenia     | 1              | 0.005          | 0.000       | 0.078       | -3.704  | 0.000   | 0.000   | 0      | 1.000   | 0.000     |
| Spain        | 3              | 0.052          | 0.009       | 0.242       | -3.237  | 0.001   | 9.879   | 2      | 0.007   | 79.756    |
| Sweden       | 4              | 0.025          | 0.008       | 0.070       | -6.603  | 0.000   | 9.707   | 3      | 0.021   | 69.096    |
| Switzerland  | 1              | 0.100          | 0.006       | 0.674       | -1.474  | 0.140   | 0.000   | 0      | 1.000   | 0.000     |
| Taiwan       | 6              | 0.067          | 0.026       | 0.158       | -5.360  | 0.000   | 39.053  | 5      | 0.000   | 87.197    |
| Tunis        | 2              | 0.007          | 0.001       | 0.045       | -5.008  | 0.000   | 0.365   | 1      | 0.546   | 0.000     |
| Turkey       | 6              | 0.033          | 0.005       | 0.196       | -3.369  | 0.001   | 57.381  | 5      | 0.000   | 91.286    |
| UK           | 4              | 0.113          | 0.059       | 0.205       | -5.718  | 0.000   | 13.650  | 3      | 0.003   | 78.023    |
| USA          | 4              | 0.266          | 0.040       | 0.757       | -0.926  | 0.355   | 337.058 | 3      | 0.000   | 99.110    |

## References:

1. Hsueh P-R, Liu Y-C, Yang D, Yan J-J, Wu T-L, Huang W-K, et al. Multicenter surveillance of antimicrobial resistance of major bacterial pathogens in intensive care units in 2000 in Taiwan. *Microbial Drug Resistance*. 2001;7(4):373-82.
2. Wroblewska M, Marchel H, Luczak M. Multidrug resistance in bacterial isolates from blood cultures of haematology patients. *International journal of antimicrobial agents*. 2002;19(3):237-40.
3. Rodríguez JL, Vázquez GJ, Bermúdez M, De Orbeta J, García Y, Rivera Y, et al. Prospective study using standardized methodology for antimicrobial susceptibility of Gram-positive cocci isolated from the Puerto Rico Medical Center. *Puerto Rico health sciences journal*. 2002;21(4).
4. Perez-Hernandez X, Mendez-Alvarez S, Delgado T, Moreno A, Reyes-Darias J, Lopez AS, et al. Low prevalence of vancomycin-resistant enterococci in clinical samples from hospitalized patients of the Canary Islands, Spain. *International Microbiology*. 2002;5(3):117-20.
5. Woodford N, Reynolds R, Turton J, Scott F, Sinclair A, Williams A, et al. Two widely disseminated strains of *Enterococcus faecalis* highly resistant to gentamicin and ciprofloxacin from bacteraemias in the UK and Ireland. *Journal of Antimicrobial Chemotherapy*. 2003;52(4):711-4.
6. Arias C, Reyes J, Zuniga M, Cortés L, Cruz C, Rico C, et al. Multicentre surveillance of antimicrobial resistance in enterococci and staphylococci from Colombian hospitals, 2001–2002. *Journal of Antimicrobial Chemotherapy*. 2003;51(1):59-68.
7. Johnson A, Henwood C, Mushtaq S, James D, Warner M, Livermore D, et al. Susceptibility of Gram-positive bacteria from ICU patients in UK hospitals to antimicrobial agents. *Journal of Hospital Infection*. 2003;54(3):179-87.
8. Mathur P, Kapil A, Chandra R, Sharma P, Das B. Antimicrobial resistance in *Enterococcus faecalis* at a tertiary care centre of northern India. *Indian Journal of Medical Research*. 2003;118:25-8.
9. Feizabadi MM, Aliahmadi A, Mobasheri F, Asgharzadeh A, Asadi S, Etemadi G. Phenotypic characteristics and population genetics of *Enterococcus faecalis* cultured from patients in Tehran during 2000–2001. *Canadian journal of microbiology*. 2003;49(10):645-9.
10. Karmarkar M, Gershom ES, Mehta P. Enterococcal infections with special reference to phenotypic characterization & drug resistance. *Indian Journal of Medical Research*. 2004;119:22-5.
11. Blahova J, Kralikova K, Krčméry V, Babalova M, Menkyna R, Glosova L, et al. Monitoring of antibiotic resistance in bacterial isolates from bacteremic patients. *Journal of chemotherapy*. 2004;16(3):269-72.
12. Streit JM, Jones RN, Sader HS, Fritsche TR. Assessment of pathogen occurrences and resistance profiles among infected patients in the intensive care unit: report from the SENTRY Antimicrobial Surveillance Program (North America, 2001). *International journal of antimicrobial agents*. 2004;24(2):111-8.
13. Kapoor L, Randhawa V, Deb M. Antimicrobial resistance of enterococcal blood isolates at a pediatric care hospital in India. *Jpn J Infect Dis*. 2005;58(2):101-3.
14. Stampone L, Del Grosso M, Boccia D, Pantosti A. Clonal spread of a vancomycin-resistant *Enterococcus faecium* strain among bloodstream-infecting isolates in Italy. *Journal of clinical microbiology*. 2005;43(4):1575-80.
15. Quiñones D, Goñi P, Rubio MC, Duran E, Gómez-Lus R. Enterococci spp. isolated from Cuba: species frequency of occurrence and antimicrobial susceptibility profile. *Diagnostic microbiology and infectious disease*. 2005;51(1):63-7.
16. Kaçmaz B, Aksoy A. Antimicrobial resistance of enterococci in Turkey. *International journal of antimicrobial agents*. 2005;25(6):535-8.
17. Sader HS, Watters AA, Fritsche TR, Jones RN. Daptomycin antimicrobial activity tested against methicillin-resistant staphylococci and vancomycin-resistant enterococci isolated in European medical centers (2005). *BMC infectious diseases*. 2007;7(1):29.
18. Shaked H, Carmeli Y, Schwartz D, Siegman-Igra Y. Enterococcal bacteraemia: epidemiological, microbiological, clinical and prognostic characteristics, and the impact of high level gentamicin resistance. *Scandinavian journal of infectious diseases*. 2006;38(11-12):995-1000.
19. Klibi N, Gharbi S, Masmoudi A, Ben Slama K, Poeta P, Zarazaga M, et al. Antibiotic resistance and mechanisms implicated in clinical enterococci in a Tunisian hospital. *Journal of chemotherapy*. 2006;18(1):20-6.
20. Waites KB, Duffy LB, Dowzicky MJ. Antimicrobial susceptibility among pathogens collected from hospitalized patients in the United States and in vitro activity of tigecycline, a new glycylcycline antimicrobial. *Antimicrobial agents and chemotherapy*. 2006;50(10):3479-84.

21. Ghoshal U, Garg A, Tiwari DP, Ayyagari A. Emerging vancomycin resistance in enterococci in India. 2006.
22. Młynarczyk G, Grzybowska W, Młynarczyk A, Tyski S, Kawecki D, Łuczak M, et al., editors. Significant increase in the isolation of glycopeptide-resistant enterococci from patients hospitalized in the transplant surgery ward in 2004–2005. *Transplantation proceedings*; 2007: Elsevier.
23. Mendiratta D, Kaur H, Deotale V, Thamke D, Narang R, Narang P. Status of high level aminoglycoside resistant *Enterococcus faecium* and *Enterococcus faecalis* in a rural hospital of central India. *Indian journal of medical microbiology*. 2008;26(4):369.
24. Emaneini M, Aligholi M, Aminshahi M. Characterization of glycopeptides, aminoglycosides and macrolide resistance among *Enterococcus faecalis* and *Enterococcus faecium* isolates from hospitals in Tehran. *Pol J Microbiol*. 2008;57(2):173-8.
25. Agarwal J, Kalyan R, Singh M. High-level aminoglycoside resistance and Beta-lactamase production in enterococci at a tertiary care hospital in India. *Jpn J Infect Dis*. 2009;62(2):158-9.
26. Billström H, Lund B, Sullivan Å, Nord CE. Virulence and antimicrobial resistance in clinical *Enterococcus faecium*. *International journal of antimicrobial agents*. 2008;32(5):374-7.
27. Zhanel GG, Adam HJ, Low DE, Blondeau J, DeCorby M, Karlowsky JA, et al. Antimicrobial susceptibility of 15,644 pathogens from Canadian hospitals: results of the CANWARD 2007–2009 study. *Diagnostic microbiology and infectious disease*. 2011;69(3):291-306.
28. Al-Jarousha A-MK, Saed A, Afifi H. Prevalence of multidrug resistant enterococci in nosocomial infection in Gaza strip. *J Al-Aqsa Univ*. 2008;12:15-24.
29. Claesson C, Nilsson LE, Kronvall G, Walder M, Sörberg M. Antimicrobial activity of tigecycline and comparative agents against clinical isolates of staphylococci and enterococci from ICUs and general hospital wards at three Swedish university hospitals. *Scandinavian journal of infectious diseases*. 2009;41(3):171-81.
30. Montravers P, Lepape A, Dubreuil L, Gauzit R, Pean Y, Benchimol D, et al. Clinical and microbiological profiles of community-acquired and nosocomial intra-abdominal infections: results of the French prospective, observational EBIIA study. *Journal of Antimicrobial chemotherapy*. 2009;63(4):785-94.
31. Gales AC, Sader HS, Ribeiro J, Zoccoli C, Barth A, Pignatari AC. Antimicrobial susceptibility of gram-positive bacteria isolated in Brazilian hospitals participating in the SENTRY Program (2005-2008). *Brazilian Journal of Infectious Diseases*. 2009;13(2):90-8.
32. Yasliani S, Mohabati Mobarez A, Doust RH, Satari M, Teymornejad O. Linezolid vancomycin resistant *Enterococcus* isolated from clinical samples in Tehran hospitals. *Indian journal of medical sciences*. 2009;63(7).
33. Adhikari L. High-level aminoglycoside resistance and reduced susceptibility to vancomycin in nosocomial enterococci. *Journal of global infectious diseases*. 2010;2(3):231.
34. Protonotariou E, Dimitroulia E, Pournaras S, Pitiriga V, Sofianou D, Tsakris A. Trends in antimicrobial resistance of clinical isolates of *Enterococcus faecalis* and *Enterococcus faecium* in Greece between 2002 and 2007. *Journal of Hospital Infection*. 2010;75(3):225-7.
35. Kohli R, Omuse G, Revathi G. Antibacterial susceptibility patterns of blood stream isolates in patients investigated at the Aga Khan University Hospital, Nairobi. *East African medical journal*. 2010;87(2):75-81.
36. Araoka H, Kimura M, Yoneyama A. A surveillance of high-level gentamicin-resistant enterococcal bacteremia. *Journal of Infection and Chemotherapy*. 2011;17(3):433-4.
37. Jain S, Kumar A, Kashyap B, Kaur IR. Clinico-epidemiological profile and high-level aminoglycoside resistance in enterococcal septicemia from a tertiary care hospital in east Delhi. *International Journal of Applied and Basic Medical Research*. 2011;1(2):80.
38. Zhanel GG, DeCorby M, Laing N, Weshnoweski B, Vashisht R, Taylor F, et al. Antimicrobial-resistant pathogens in intensive care units in Canada: results of the Canadian National Intensive Care Unit (CAN-ICU) study, 2005-2006. *Antimicrobial agents and chemotherapy*. 2008;52(4):1430-7.
39. Mira M-U, Deana M, Zora J, Vera G, Biljana M, Biljana R. Prevalence of different enterococcal species isolated from blood and their susceptibility to antimicrobial drugs in Vojvodina, Serbia, 2011-2013. *African journal of microbiology research*. 2014;8(8):819-24.
40. Aslan S, Citak EC, Yis R, Degirmenci S, Arman D. Bacterial spectrum and antimicrobial susceptibility pattern of bloodstream infections in children with febrile neutropenia: experience of single center in southeast of Turkey. *Indian journal of microbiology*. 2012;52(2):203-8.
41. Olawale KO, Fadiora SO, Taiwo SS. Prevalence of hospital acquired enterococci infections in two primary-care hospitals in Osogbo, Southwestern Nigeria. *African journal of infectious diseases*. 2011;5(2).
42. Conceição N, Oliveira CdCHB, Silva PRd, Ávila BGM, Oliveira AGd. Trends in antimicrobial resistance among clinical isolates of enterococci in a Brazilian tertiary hospital: a 4-year study. *Revista da Sociedade Brasileira de Medicina Tropical*. 2011;44(2):177-81.
43. Prevention ECfD, Control. Antimicrobial resistance surveillance in Europe 2013. ECDC Stockholm; 2014.



44. Hammerum AM, Lester CH, Olsen SS, Holm A, Hansen DS, Schønheyder HC. Molecular characterisation of high-level gentamicin-resistant enterococci from bloodstream infections in Denmark: first description of clonal spread of aph (2'')-Ib. *International journal of antimicrobial agents*. 2012;39(3):266-8.
45. El-Din RAA, El-Mahdy HS. Molecular characterization of enterococcus strains isolated from cases of neonatal sepsis in neonatal intensive care unit. *African Journal of Microbiology Research*. 2013;6(44):7206-11.
46. Kuch A, Willems RJ, Werner G, Coque TM, Hammerum AM, Sundsfjord A, et al. Insight into antimicrobial susceptibility and population structure of contemporary human *Enterococcus faecalis* isolates from Europe. *Journal of antimicrobial chemotherapy*. 2011;67(3):551-8.
47. Salem-Bekhit M, Moussa I, Muharram M, Alanazy F, Hefni H. Prevalence and antimicrobial resistance pattern of multidrug-resistant enterococci isolated from clinical specimens. *Indian journal of medical microbiology*. 2012;30(1):44.
48. Nepal H, Khanal B, Acharya A, Gyawali N, Jha P, Paudel R. High-level gentamicin resistance and vancomycin resistance in clinical isolates of enterococci in a tertiary care hospital in eastern Nepal. *Nepal Medical College journal: NMCJ*. 2012;14(1):60-3.
49. Djahmi N, Boutet-Dubois A, Nedjai S, Dekhil M, Sotto A, Lavigne J-P. Molecular epidemiology of *Enterococcus* sp. isolated in a university hospital in Algeria. *Scandinavian journal of infectious diseases*. 2012;44(9):656-62.
50. Sreeja S, Sreenivasa Babu P, Prathab A. The prevalence and the characterization of the enterococcus species from various clinical samples in a tertiary care hospital. *Journal of clinical and diagnostic research: JCDR*. 2012;6(9):1486.
51. Soltani R, Khalili H, Abdollahi A, Rasoolinejad M, Dashti-Khavidaki S. Nosocomial Gram-positive antimicrobial susceptibility pattern at a referral teaching hospital in Tehran, Iran. *Future microbiology*. 2012;7(7):903-10.
52. Khalili H, Dashti-Khavidaki S, Karimzadeh I, Jafari S, Abdollahi A, Shahidi MR, et al. Changes in 4-year antimicrobial resistance pattern of gram-positive bacteria at the main referral teaching hospital, Tehran, Iran. *Acta Medica Iranica*. 2012;50(7):493-504.
53. Sharifi Y, Hasani A, Ghotaslou R, Varshochi M, Hasani A, Soroush MH, et al. Vancomycin-resistant enterococci among clinical isolates from north-west Iran: identification of therapeutic surrogates. *Journal of medical microbiology*. 2012;61(4):600-2.
54. Coombs GW, Pearson JC, Daley DA, Le T, Robinson OJ, Gottlieb T, et al. Molecular epidemiology of enterococcal bacteremia in Australia. *Journal of clinical microbiology*. 2014;52(3):897-905.
55. Wang J-T, Chang S-C, Wang H-Y, Chen P-C, Shiao Y-R, Lauderdale T-L. High rates of multidrug resistance in *Enterococcus faecalis* and *E. faecium* isolated from inpatients and outpatients in Taiwan. *Diagnostic microbiology and infectious disease*. 2013;75(4):406-11.
56. Fernandes SC, Dhanashree B. Drug resistance & virulence determinants in clinical isolates of *Enterococcus* species. *The Indian journal of medical research*. 2013;137(5):981.
57. Praharaj I, Sujatha S, Parija SC. Phenotypic & genotypic characterization of vancomycin resistant *Enterococcus* isolates from clinical specimens. *The Indian journal of medical research*. 2013;138(4):549.
58. Celik S, Cakirlar FK, Torun MM. Presence of vancomycin, aminoglycosides and erythromycin resistance genes in enterococci isolated from clinical samples in Turkey. *Clinical laboratory*. 2014;60(11):1801-6.
59. KAFIL HS, ASGHARZADEH M. Vancomycin-resistant enterococcus *faecium* and *enterococcus faecalis* isolated from education hospital of Iran. *Maedica*. 2014;9(4):323.
60. Padmasini E, Padmaraj R, Ramesh SS. High level aminoglycoside resistance and distribution of aminoglycoside resistant genes among clinical isolates of *Enterococcus* species in Chennai, India. *The Scientific World Journal*. 2014;2014.
61. Moemen D, Tawfeek D, Badawy W. Healthcare-associated vancomycin resistant *Enterococcus faecium* infections in the Mansoura University Hospitals intensive care units, Egypt. *Brazilian Journal of Microbiology*. 2015;46(3):777-83.
62. Sirkhazi M, Sarriff A, Aziz NA, Almana F, Arafat O, Shorman M. Bacterial Spectrum, Isolation Sites and Susceptibility Patterns of Pathogens in Adult Febrile Neutropenic Cancer Patients at a Specialist Hospital in Saudi Arabia. *World journal of oncology*. 2014;5(5-6):196.
63. Babar N, Usman J, Munir T, Gill MM, Anjum R, Gilani M, et al. Frequency and antibiogram of vancomycin resistant enterococcus in a tertiary care hospital. *J Coll Physicians Surg Pak*. 2014;24(1):27-9.
64. Abat C, Raoult D, Rolain J-M. Low level of resistance in enterococci isolated in four hospitals, Marseille, France. *Microbial Drug Resistance*. 2016;22(3):218-22.
65. Kajihara T, Nakamura S, Iwanaga N, Oshima K, Takazono T, Miyazaki T, et al. Clinical characteristics and risk factors of enterococcal infections in Nagasaki, Japan: a retrospective study. *BMC infectious diseases*. 2015;15(1):426.

66. Bhatt P, Maj AP, Brig AS, Retd APSC, Col NG, Das NK, et al. Emergence of multidrug resistant enterococci at a tertiary care centre. *medical journal armed forces india*. 2015;71(2):139-44.
67. Nasaj M, Mousavi SM, Hosseini SM, Arabestani MR. Prevalence of virulence factors and vancomycin-resistant genes among *Enterococcus faecalis* and *E. faecium* isolated from clinical specimens. *Iranian journal of public health*. 2016;45(6):806.
68. Chakraborty A, Pal NK, Sarkar S, Gupta MS. Antibiotic resistance pattern of Enterococci isolates from nosocomial infections in a tertiary care hospital in Eastern India. *Journal of natural science, biology, and medicine*. 2015;6(2):394.
69. Zadeh AH, Shojapour M, Nazari R, Akbari M, Sofian M, Abtahi H. Genotyping of vancomycin resistant enterococci in arak hospitals. *Jundishapur journal of microbiology*. 2015;8(4).
70. Maina D, Omuse G, Revathi G, Adam RD. Spectrum of microbial diseases and resistance patterns at a private teaching hospital in Kenya: implications for clinical practice. *PloS one*. 2016;11(1):e0147659.
71. Gawryszewska I, Żabicka D, Bojarska K, Malinowska K, Hryniewicz W, Sadowy E. Invasive enterococcal infections in Poland: the current epidemiological situation. *European Journal of Clinical Microbiology & Infectious Diseases*. 2016;35(5):847-56.
72. Arabestani MR, Nasaj M, Mousavi SM. Correlation between infective factors and antibiotic resistance in Enterococci clinical isolates in West of Iran. *Chonnam medical journal*. 2017;53(1):56-63.
73. Tuhina B, Anupurba S, Karuna T. Emergence of antimicrobial resistance and virulence factors among the unusual species of enterococci, from North India. *Indian Journal of Pathology and Microbiology*. 2016;59(1):50.
74. Flamm RK, Mendes RE, Hogan PA, Streit JM, Ross JE, Jones RN. Linezolid surveillance results for the United States (LEADER surveillance program 2014). *Antimicrobial agents and chemotherapy*. 2016:AAC. 02803-15.
75. Biswas PP, Dey S, Sen A, Adhikari L. Molecular characterization of virulence genes in vancomycin-resistant and vancomycin-sensitive enterococci. *Journal of global infectious diseases*. 2016;8(1):16.
76. Mittal S, Singla P, Deep A, Bala K, Sikka R, Garg M, et al. Vancomycin and high level aminoglycoside resistance in *Enterococcus* spp. in a tertiary health care centre: a therapeutic concern. *Journal of pathogens*. 2016;2016.
77. Phukan C, Lahkar M, Ranotkar S, Saikia KK. Emergence of vanA gene among vancomycin-resistant enterococci in a tertiary care hospital of North-East India. *The Indian journal of medical research*. 2016;143(3):357.
78. Armin S, Fallah F, Karimi A, Rashidan M, Shirdust M, Azimi L. Genotyping, antimicrobial resistance and virulence factor gene profiles of vancomycin resistance *Enterococcus faecalis* isolated from blood culture. *Microbial pathogenesis*. 2017;109:300-4.
79. Jaramago JM, Ibáñez RA, Miñana JC, Suárez-Varela MM. Perfiles de resistencia y factores de riesgo de microorganismos resistentes en bacteriemia de origen abdominal. *Revista Española de Anestesiología y Reanimación*. 2017;64(9):490-8.
80. Jahansepa A, Aghazadeh M, Rezaee MA, Hasani A, Sharifi Y, Aghazadeh T, et al. Occurrence of *Enterococcus faecalis* and *Enterococcus faecium* in Various Clinical Infections: Detection of Their Drug Resistance and Virulence Determinants. *Microbial Drug Resistance*. 2018;24(1):76-82.
81. Yilema A, Moges F, Tadele S, Endris M, Kassu A, Abebe W, et al. Isolation of enterococci, their antimicrobial susceptibility patterns and associated factors among patients attending at the University of Gondar Teaching Hospital. *BMC infectious diseases*. 2017;17(1):276.
82. Pitiriga V, Kanellopoulos P, Kampos E, Panagiotakopoulos G, Tsakris A, Saroglou G. Antimicrobial stewardship program in a Greek hospital: implementing a mandatory prescription form and prospective audits. *Future microbiology*. 2018(0).
83. Karimzadeh I, Mirzaee M, Sadeghimanesh N, Sagheb MM. Antimicrobial resistance pattern of Gram-positive bacteria during three consecutive years at the nephrology ward of a tertiary referral hospital in Shiraz, Southwest Iran. *Journal of research in pharmacy practice*. 2016;5(4):238.
